# Supplementary material for: Synthesis of 4-chalcogenyl pyrazoles via electrophilic chalcogenation/cyclization of α,β-alkynic hydrazones
Source: Royal Society of Chemistry journal article supplement (doi:10.1039/d0ob00050g), 2020-01-01

## Supplementary Information

### **Synthesis of 4-Chalcogenyl Pyrazoles via Electrophilic Chalcogenation/Cyclization of $\alpha,\beta$ -Alkynic Hydrazones**

Xinzhang Yu,<sup>a</sup> Yu-Zhu Shang,<sup>b</sup> Yu-Fei Cheng,<sup>b</sup> Jun Tian,<sup>b</sup> Yulan Niu,<sup>a</sup> and Wen-Chao  
Gao<sup>\*b</sup>

<sup>a</sup> Taiyuan Institute of Technology, Taiyuan 030008

<sup>b</sup> Taiyuan University of Technology, Taiyuan, 030024

E-mail: [niuyulan@163.com](mailto:niuyulan@163.com);  
[gaowenchao@tyut.edu.cn](mailto:gaowenchao@tyut.edu.cn)

Cyclization of N-sulfonyl hydrazones.....S2

Copies of NMR spectra.....S3

## Cyclization of N-sulfonyl hydrazones

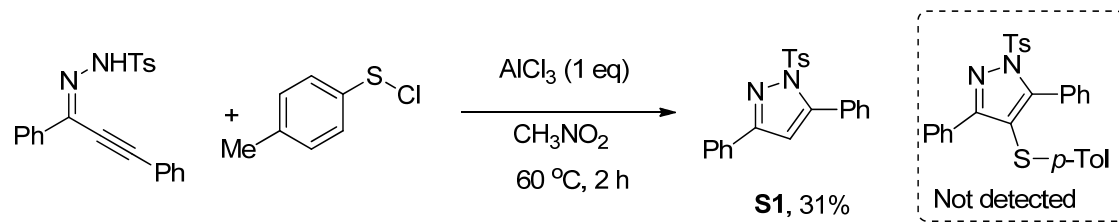

S1

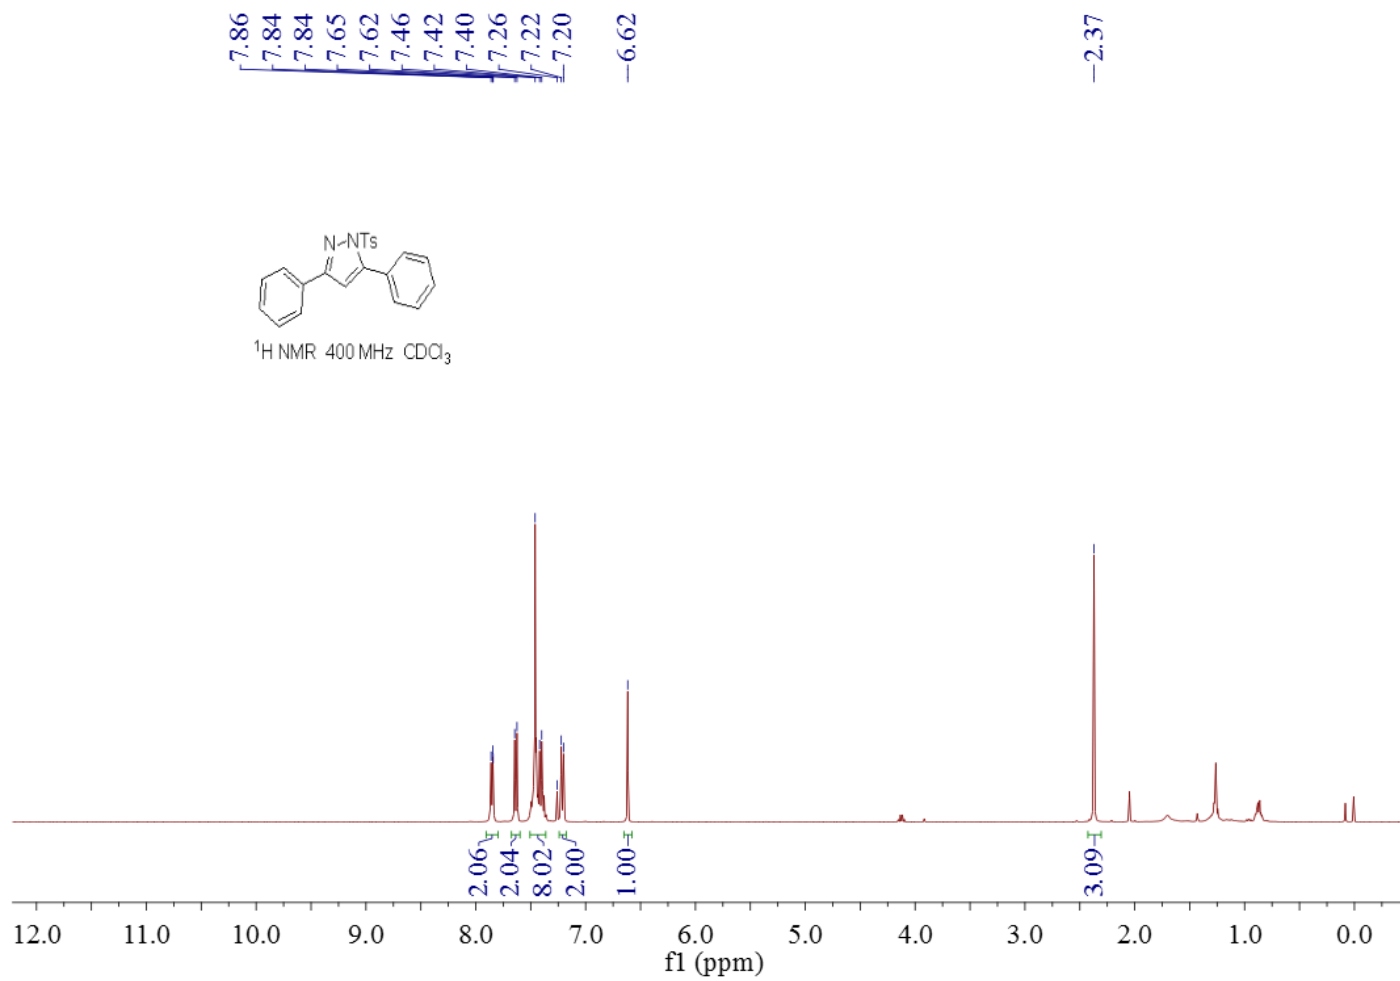

S3

3a

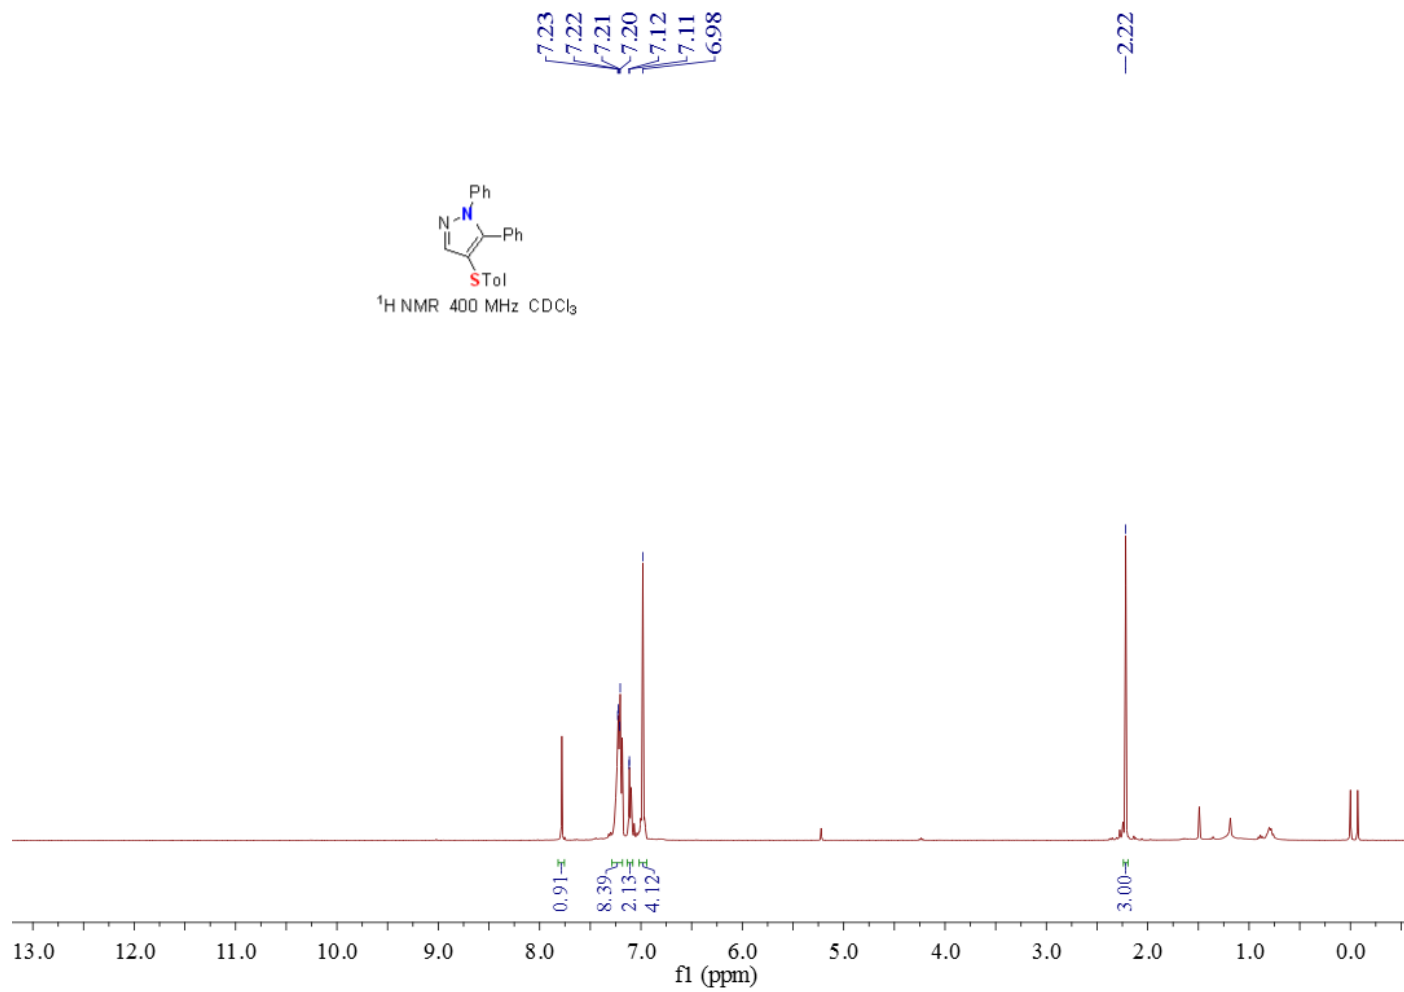

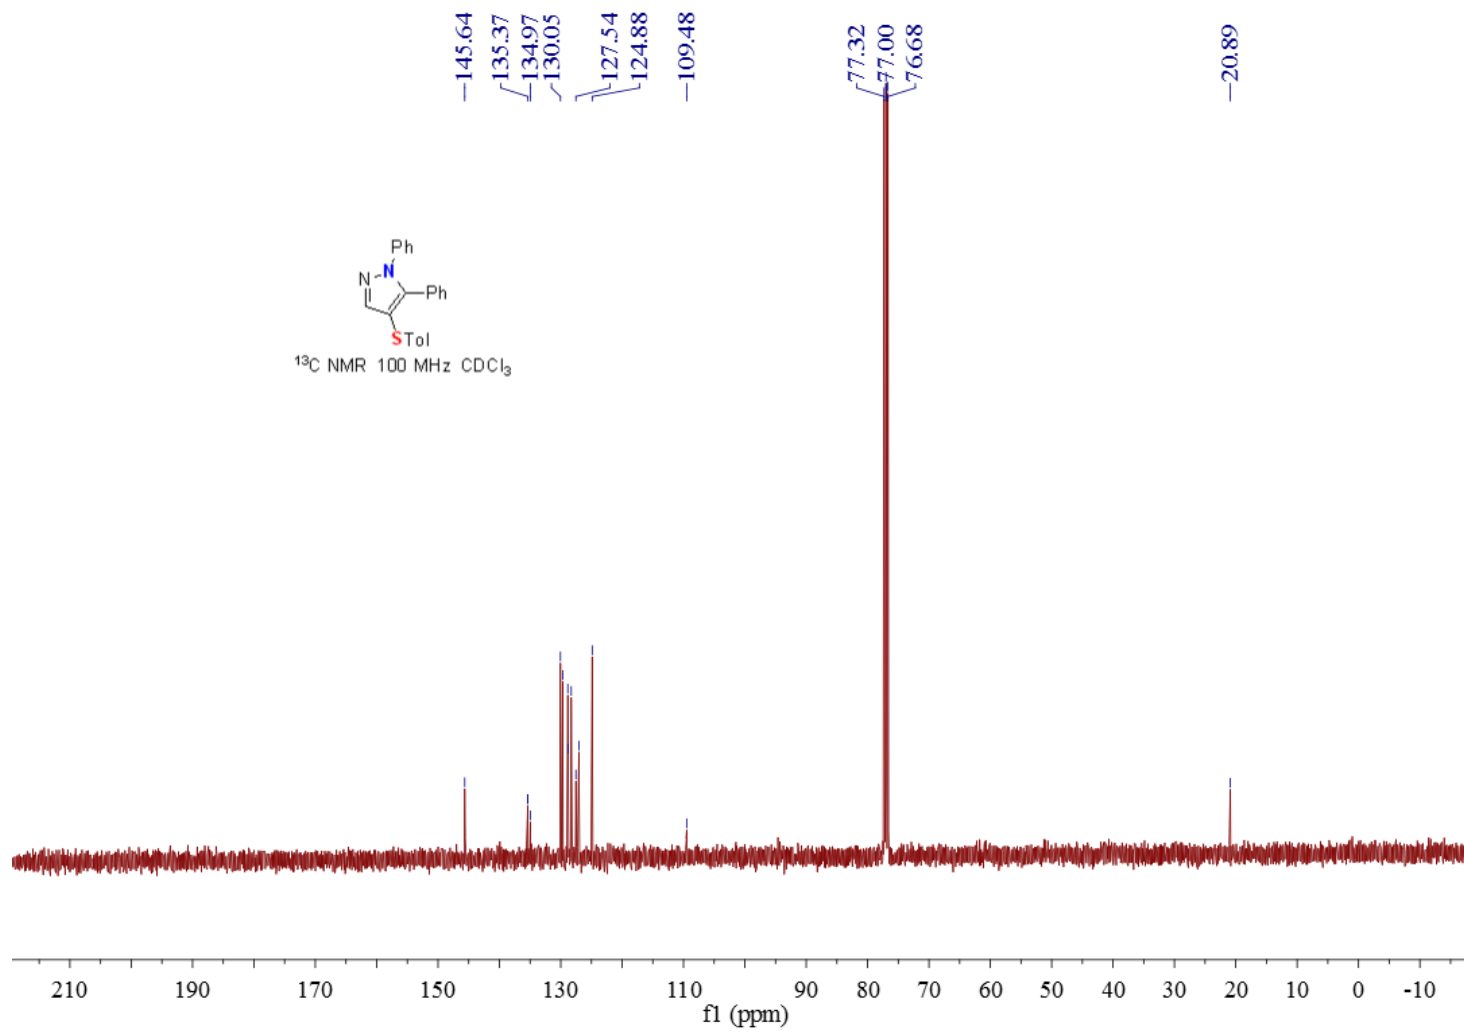

3b

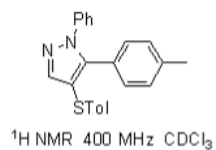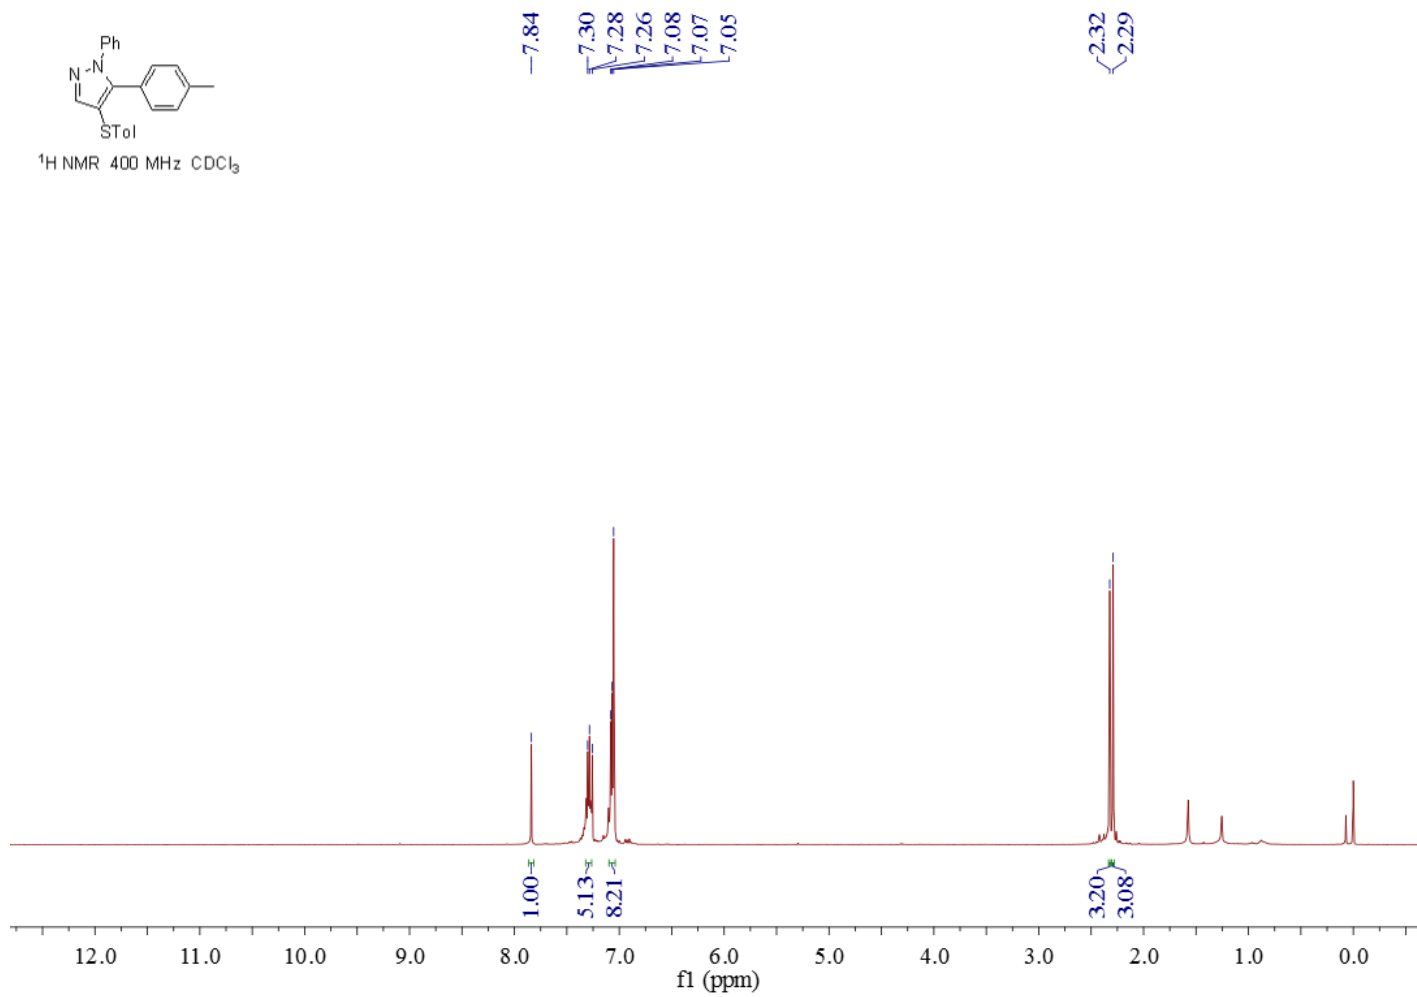

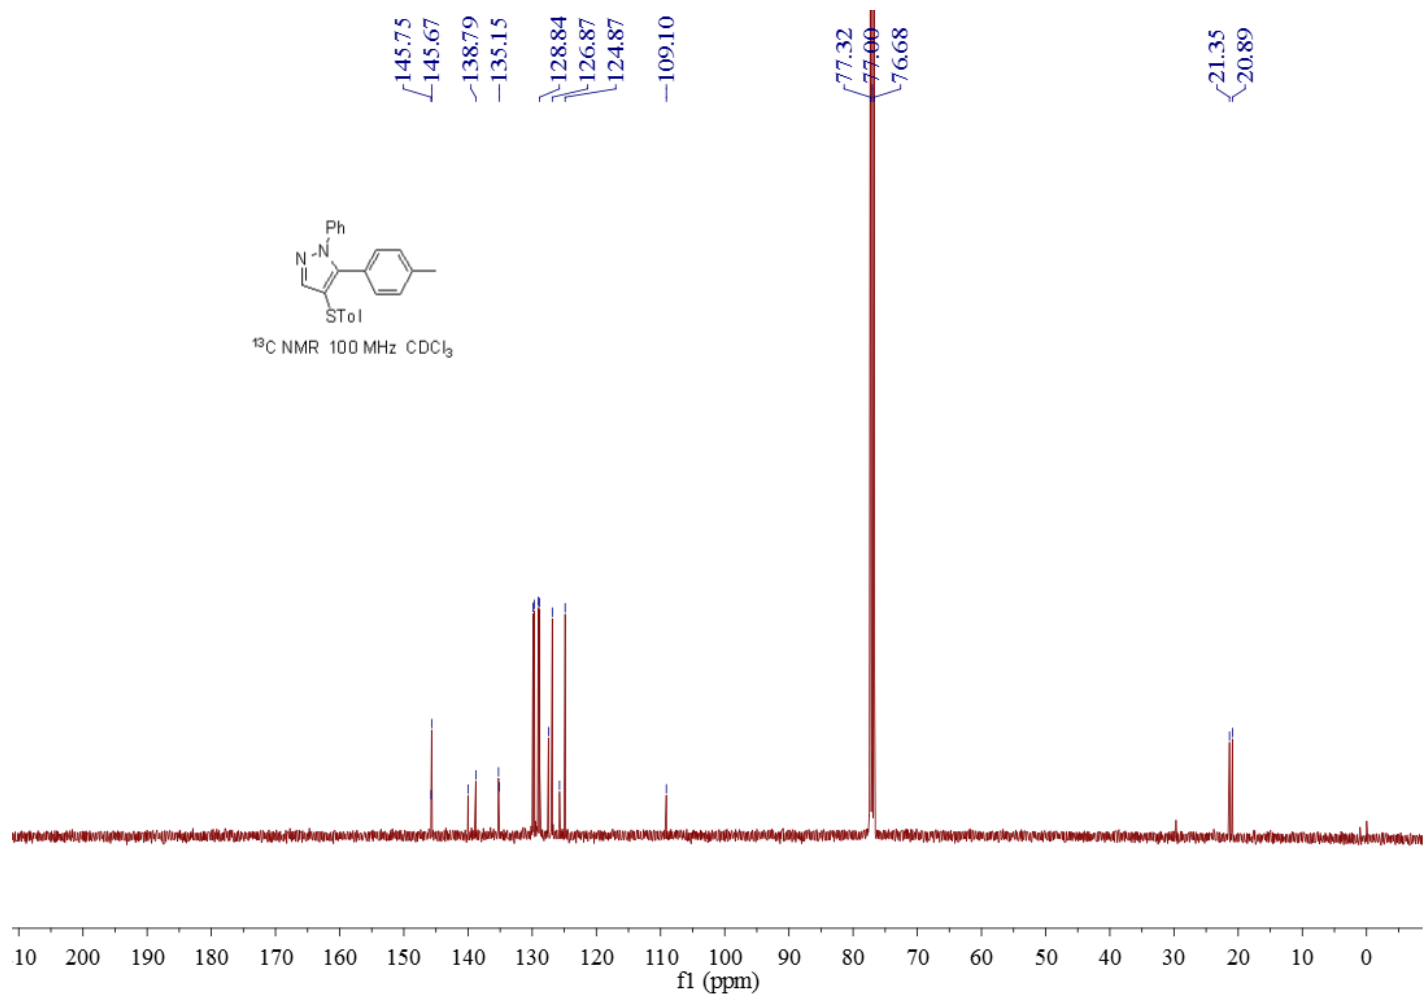

3c

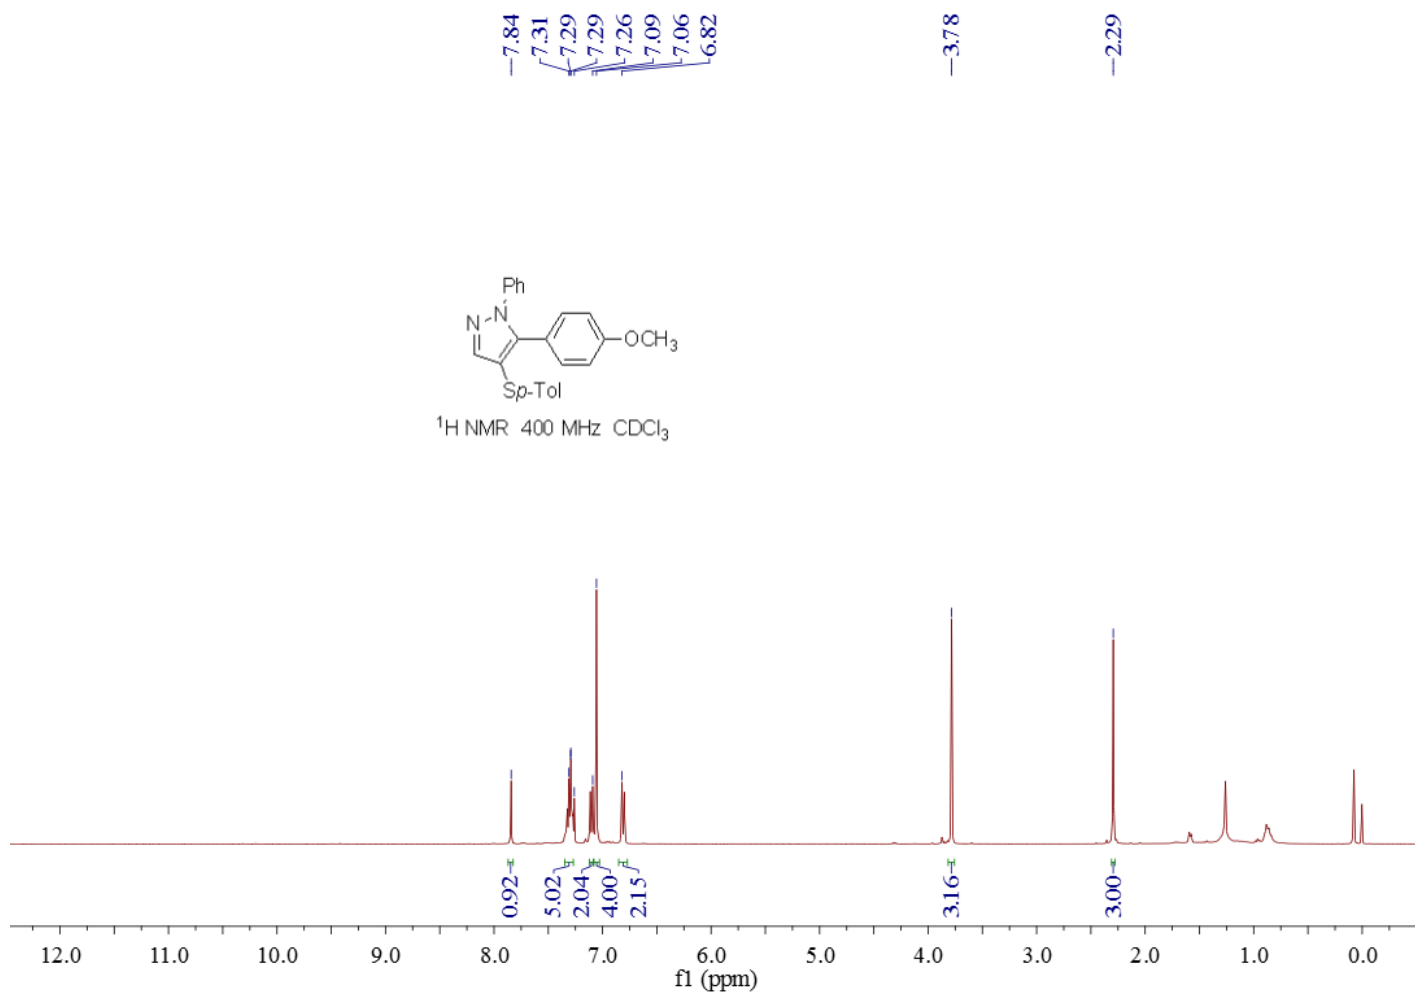



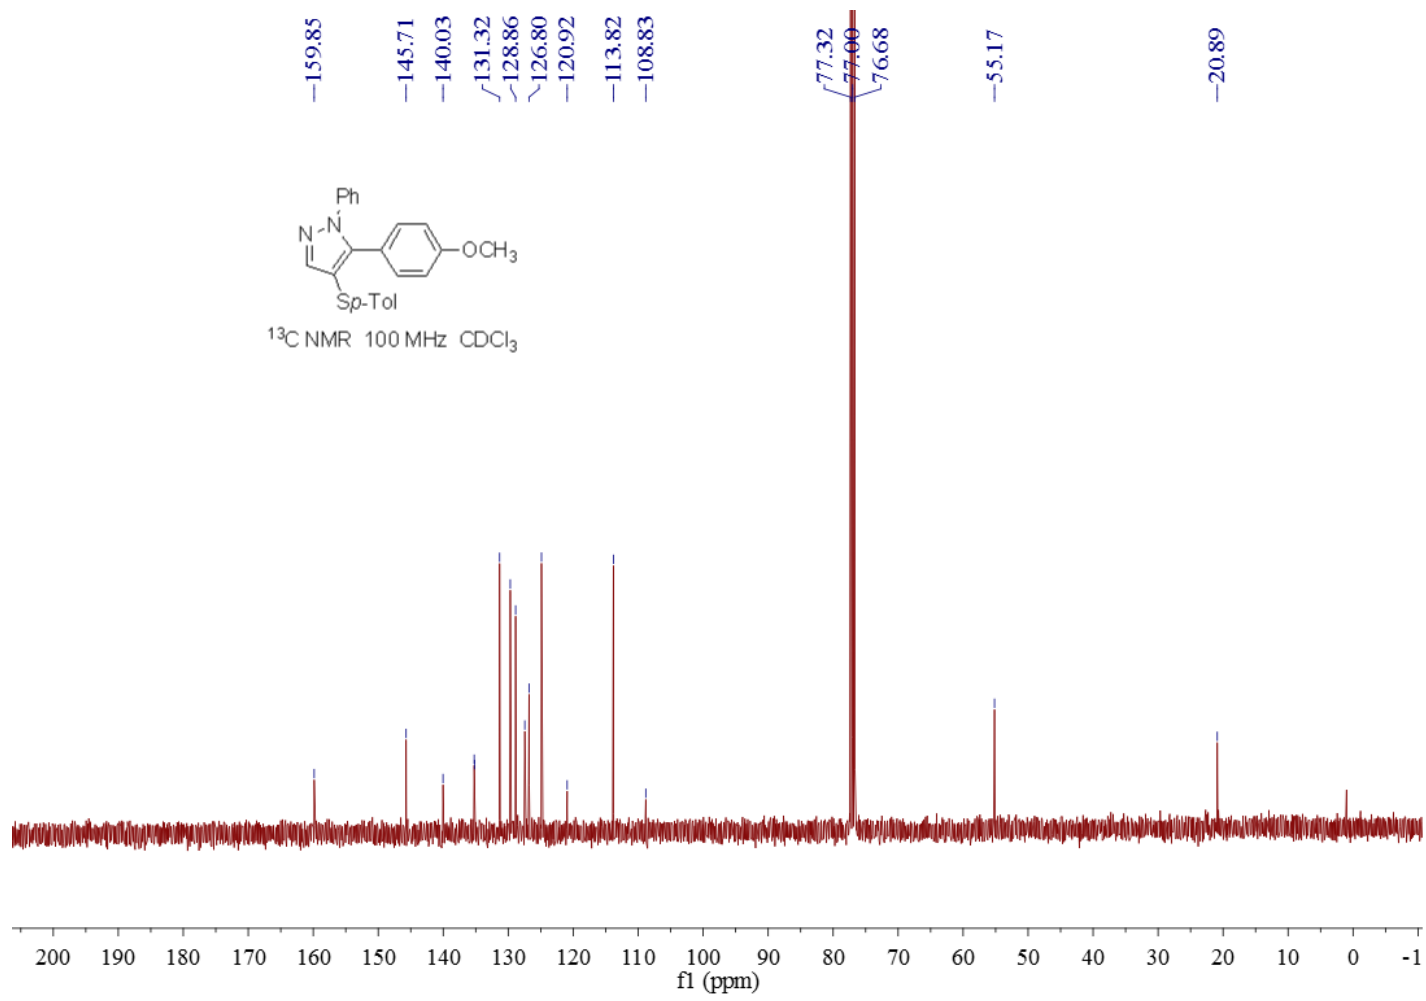

3d

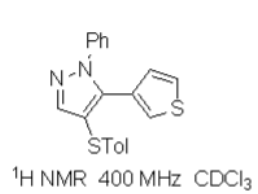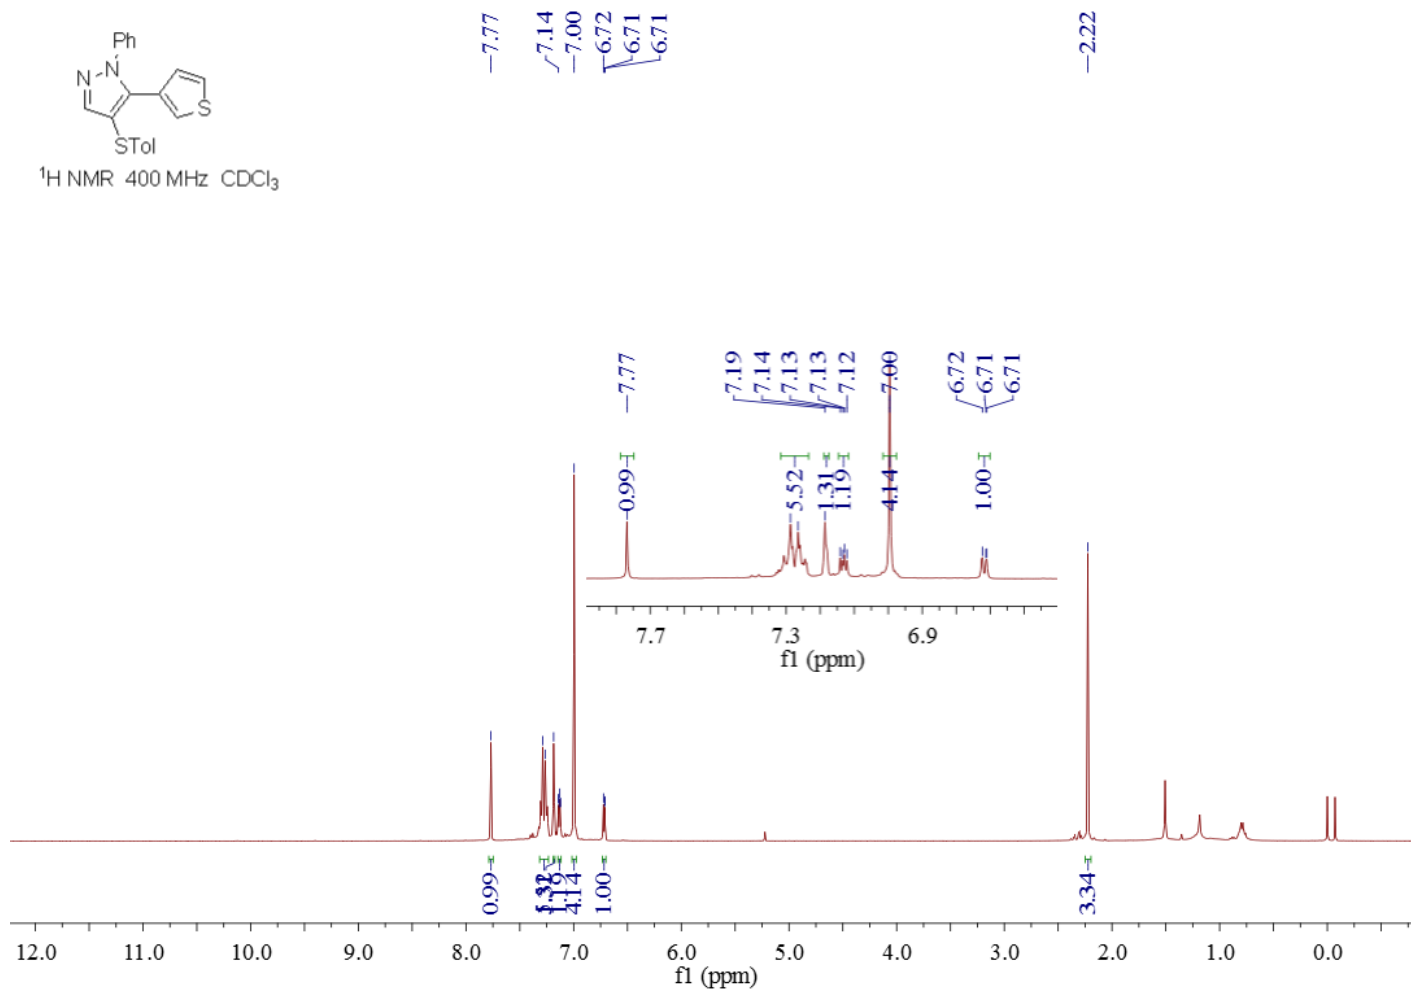

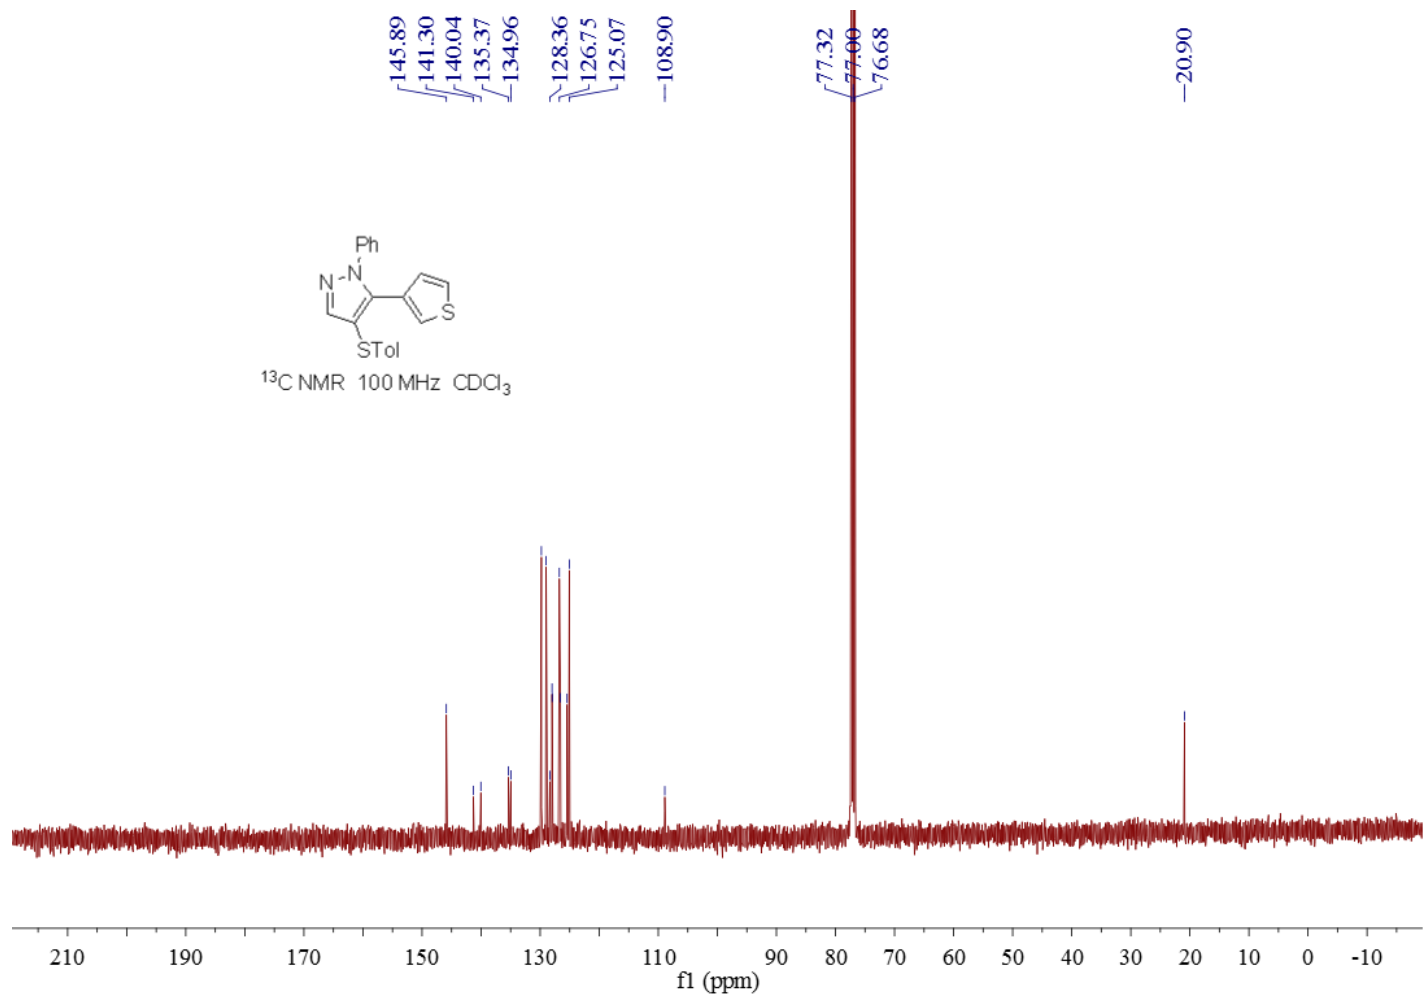

3e

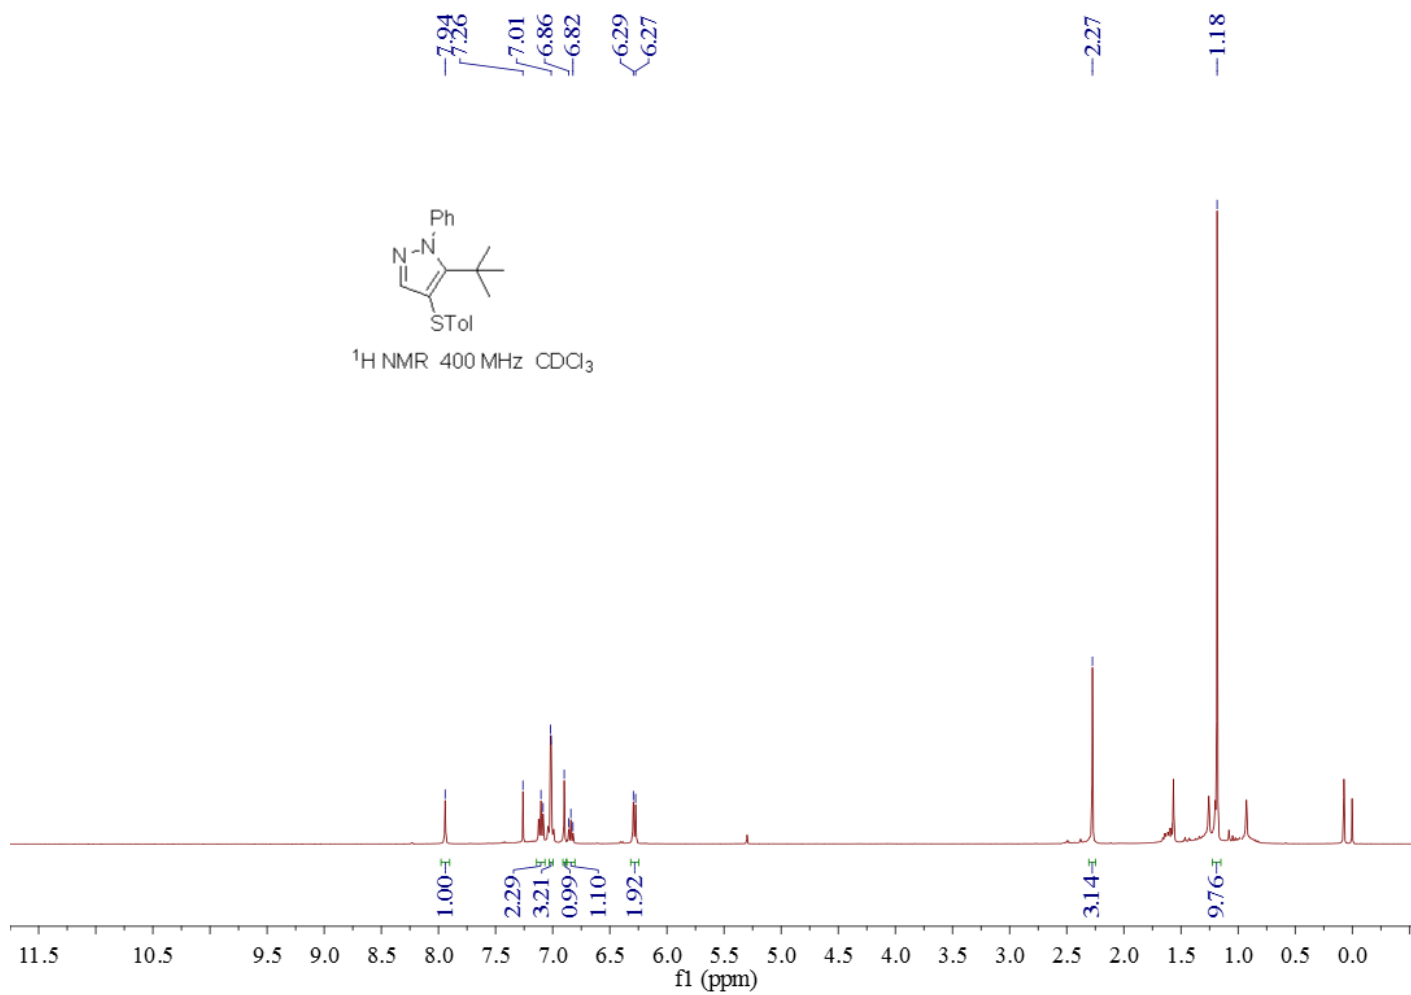

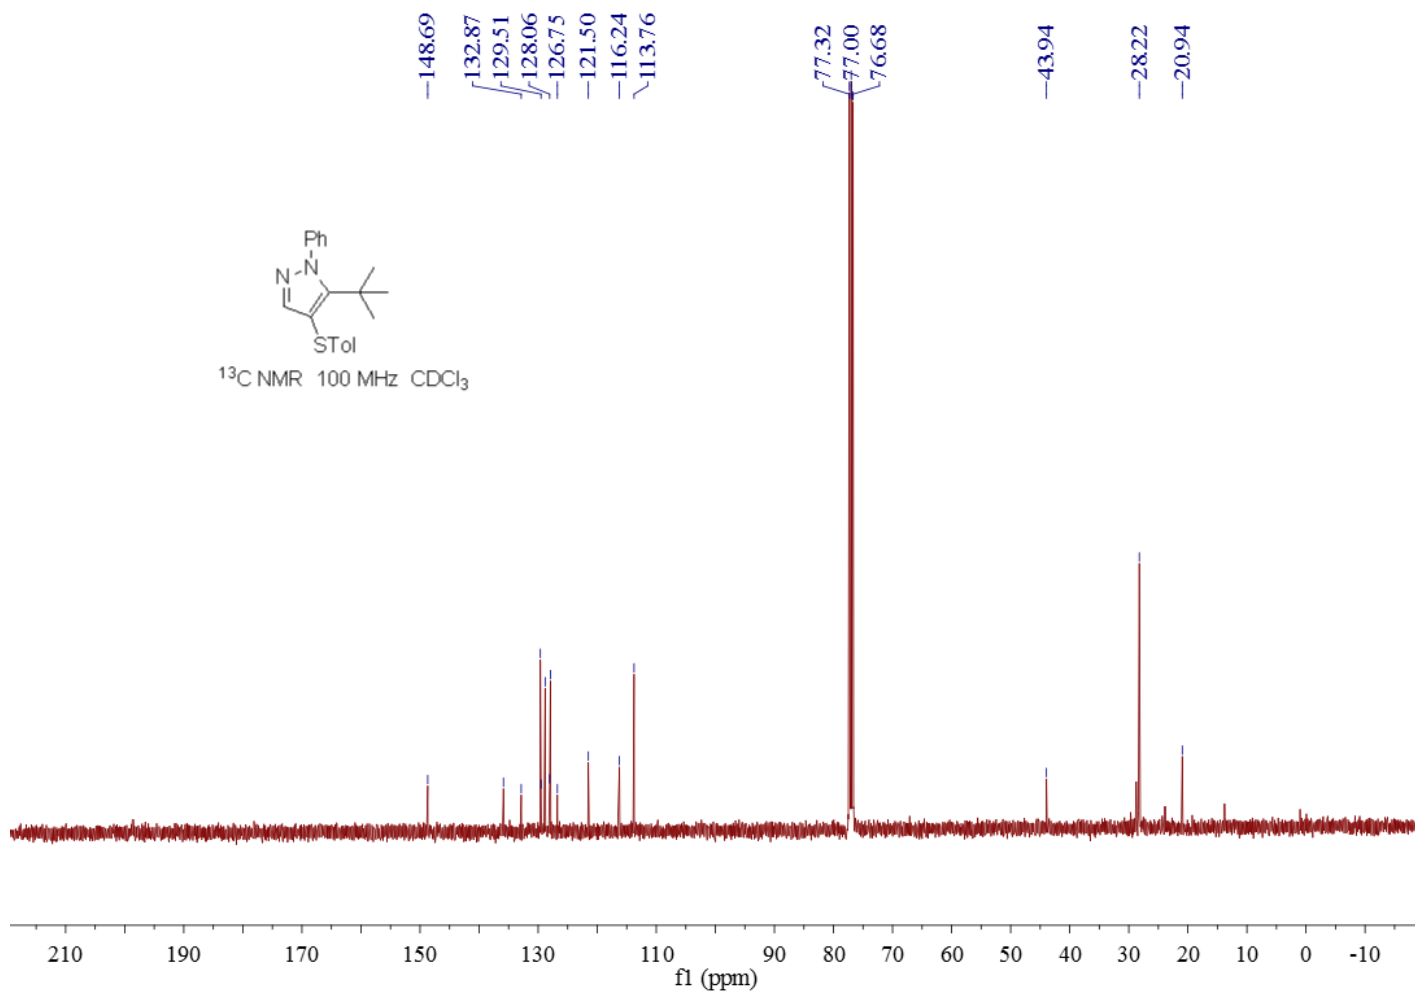

3f

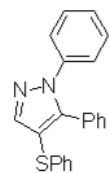

<sup>1</sup>H NMR 400 MHz CDCl<sub>3</sub>

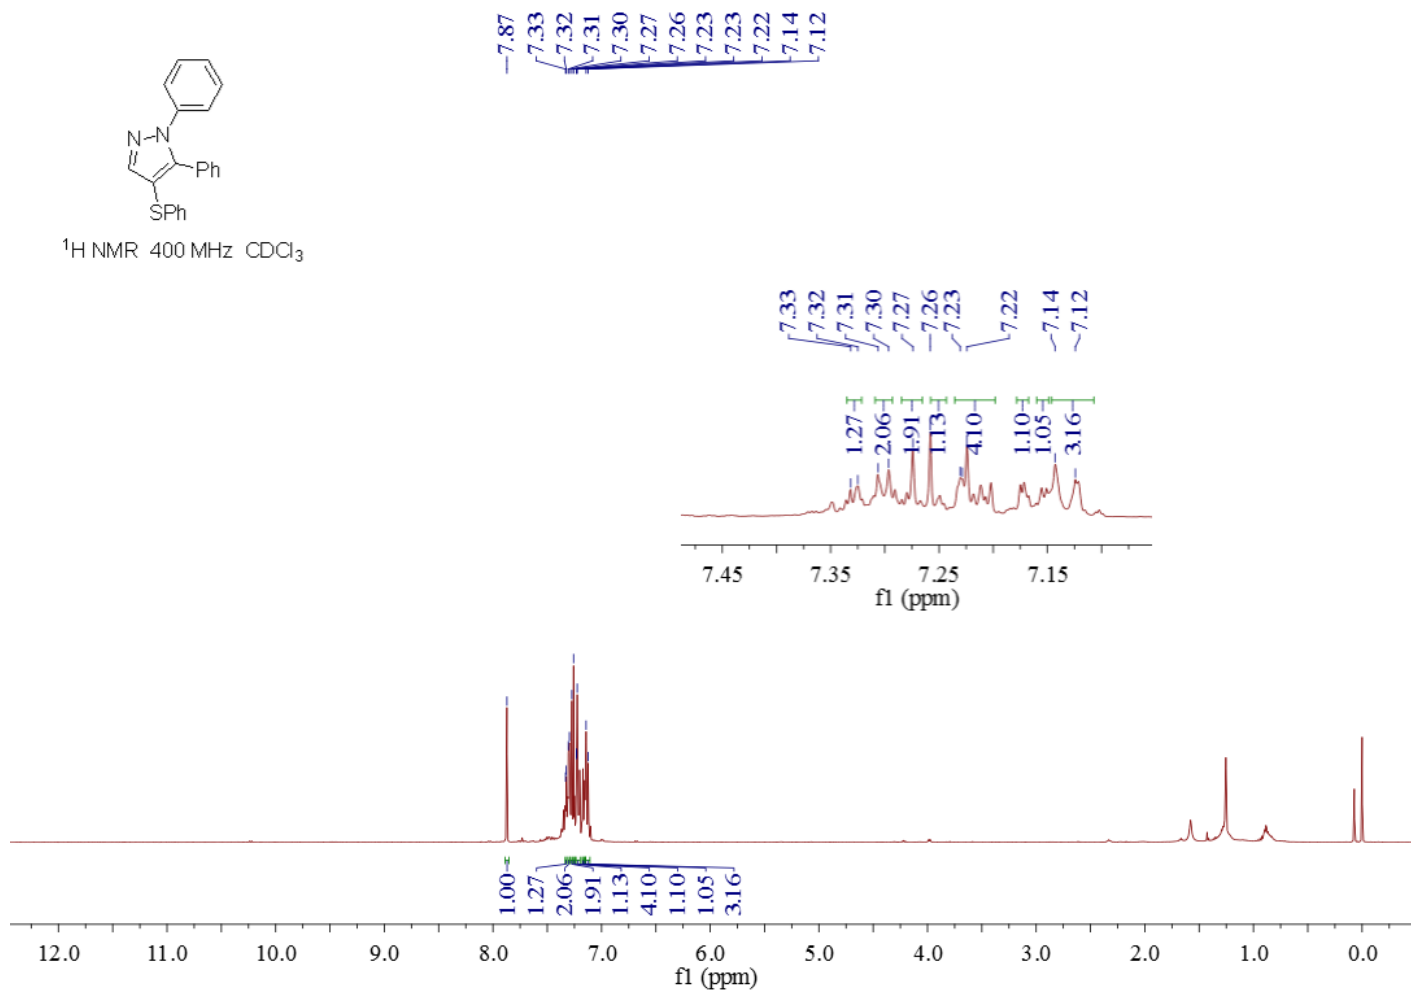

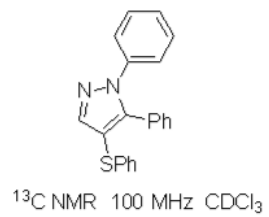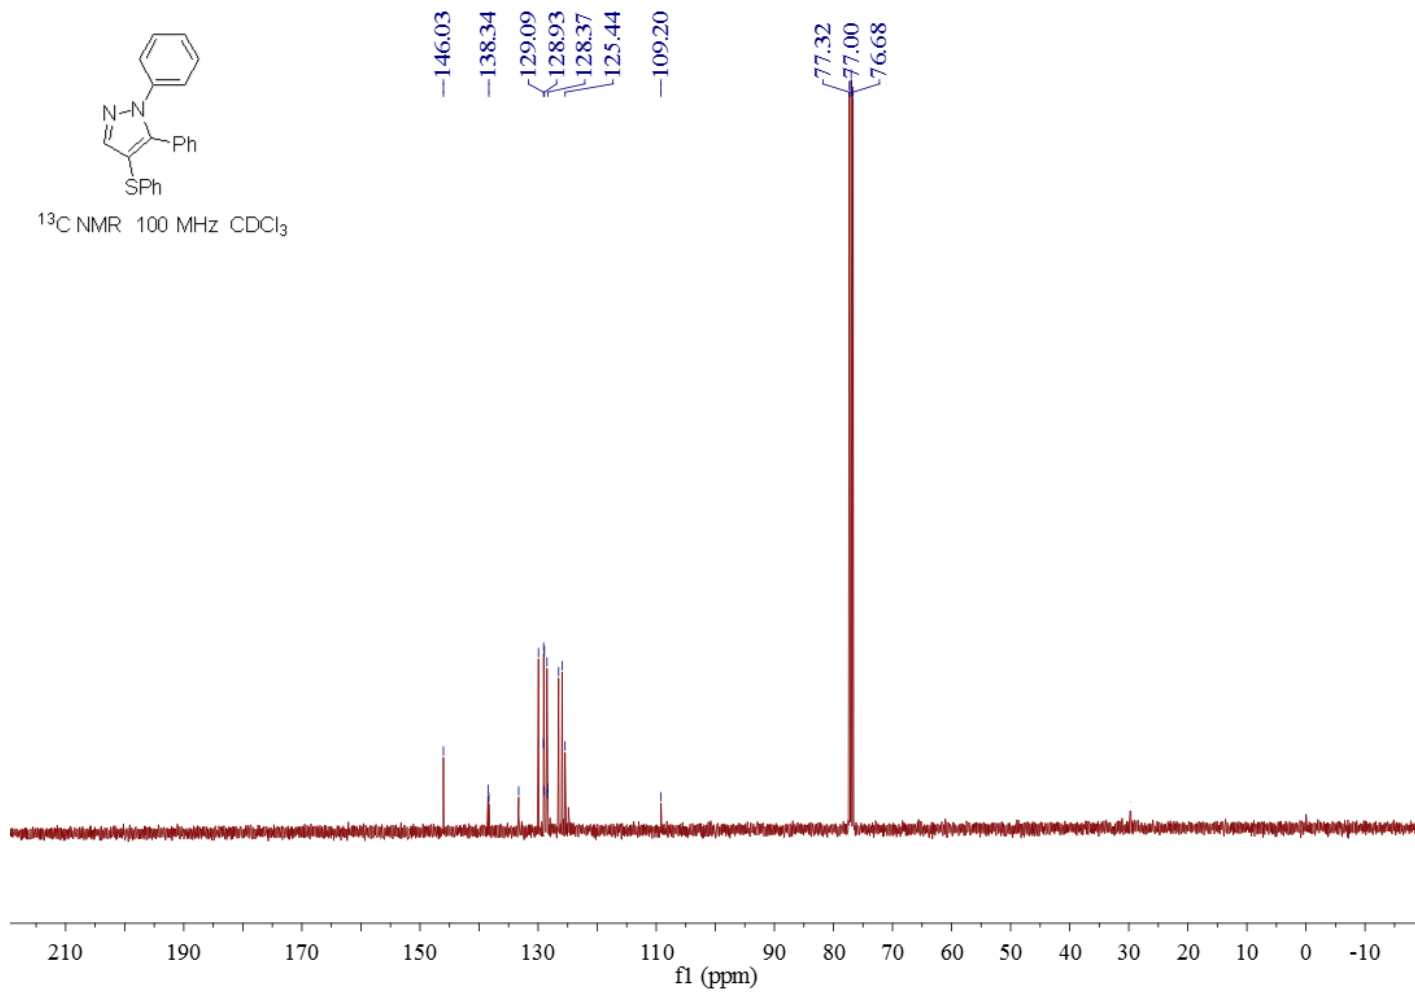

3g

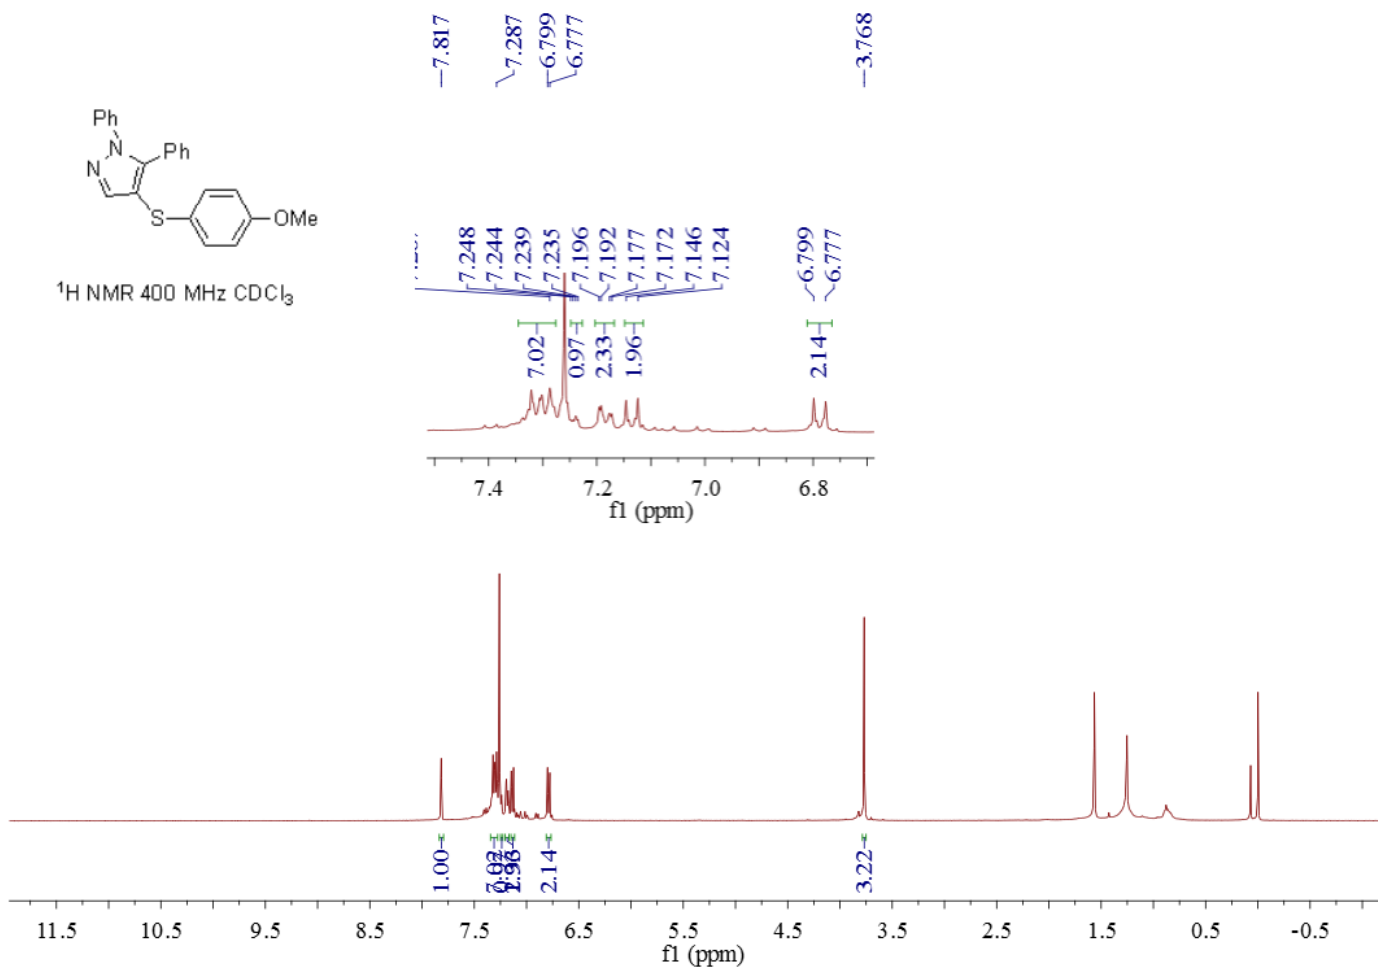



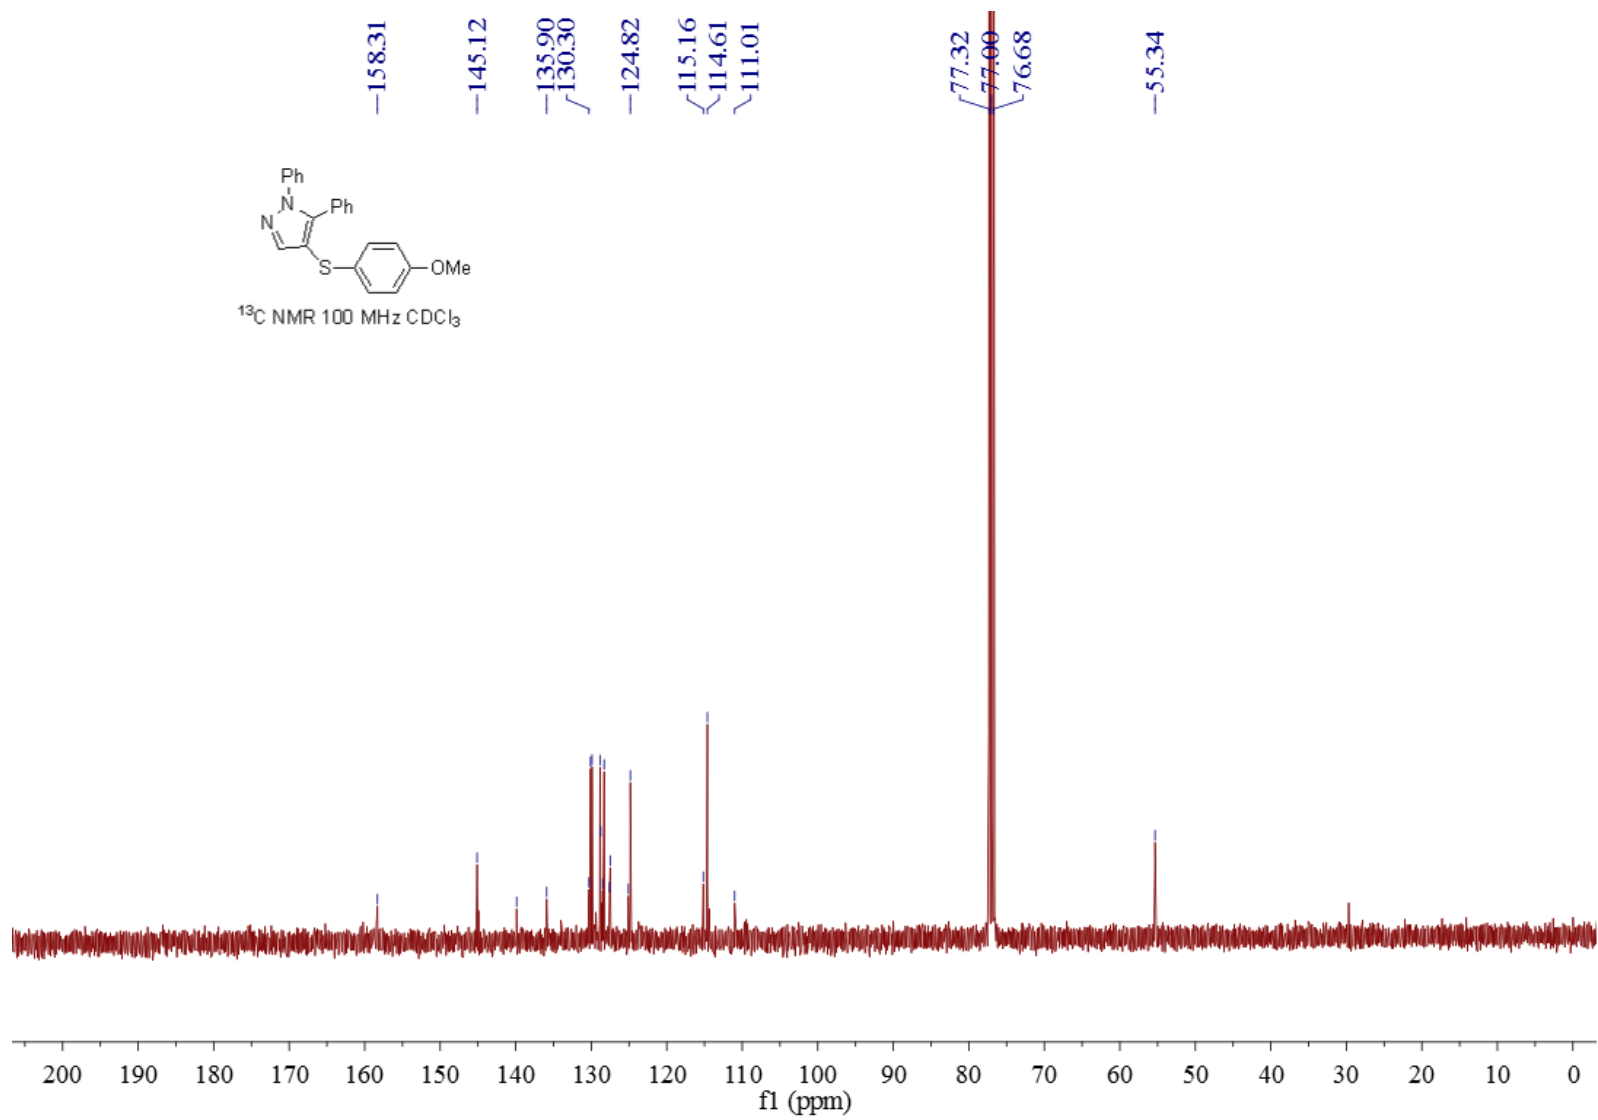

3h

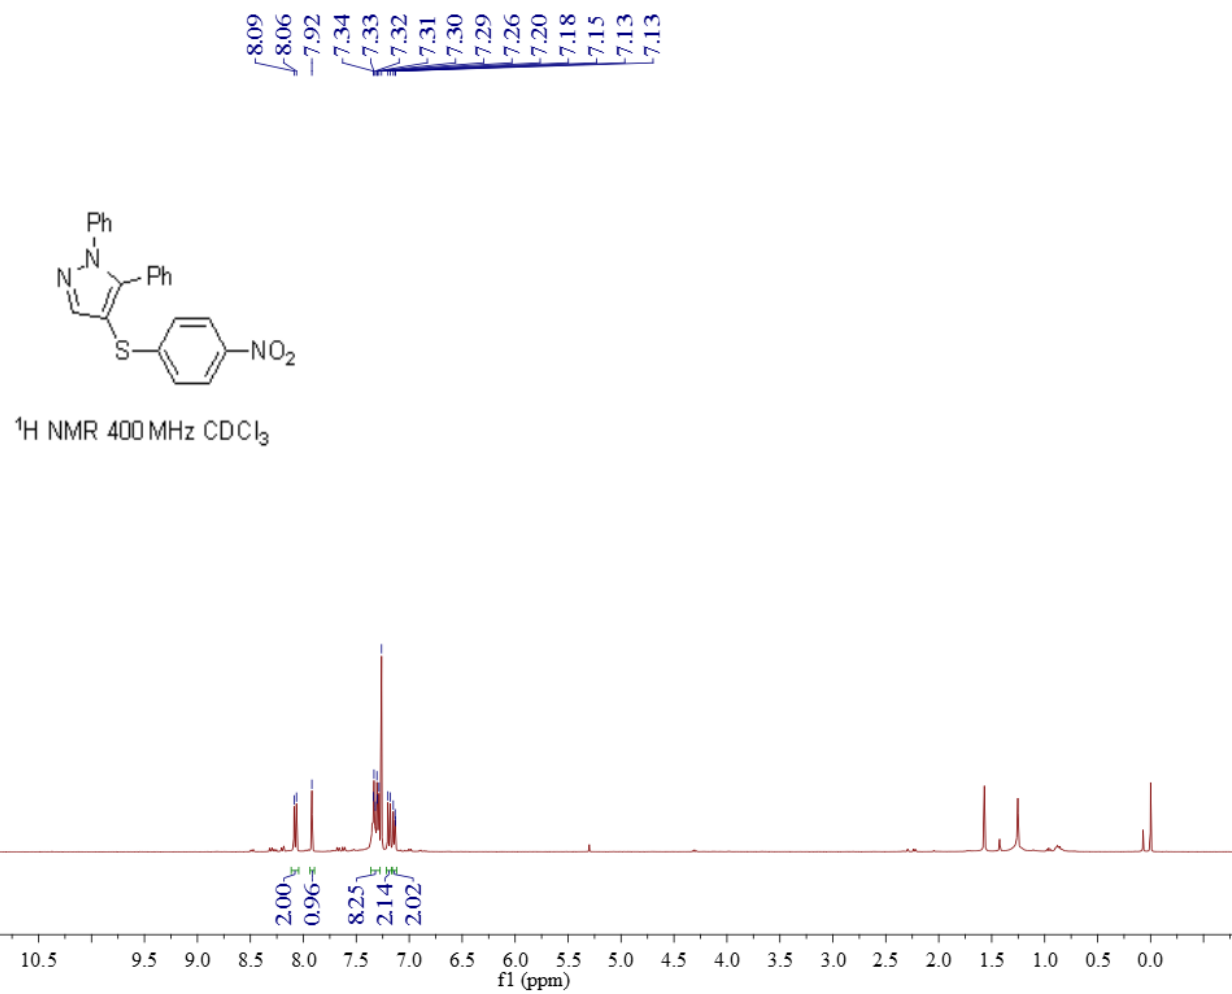

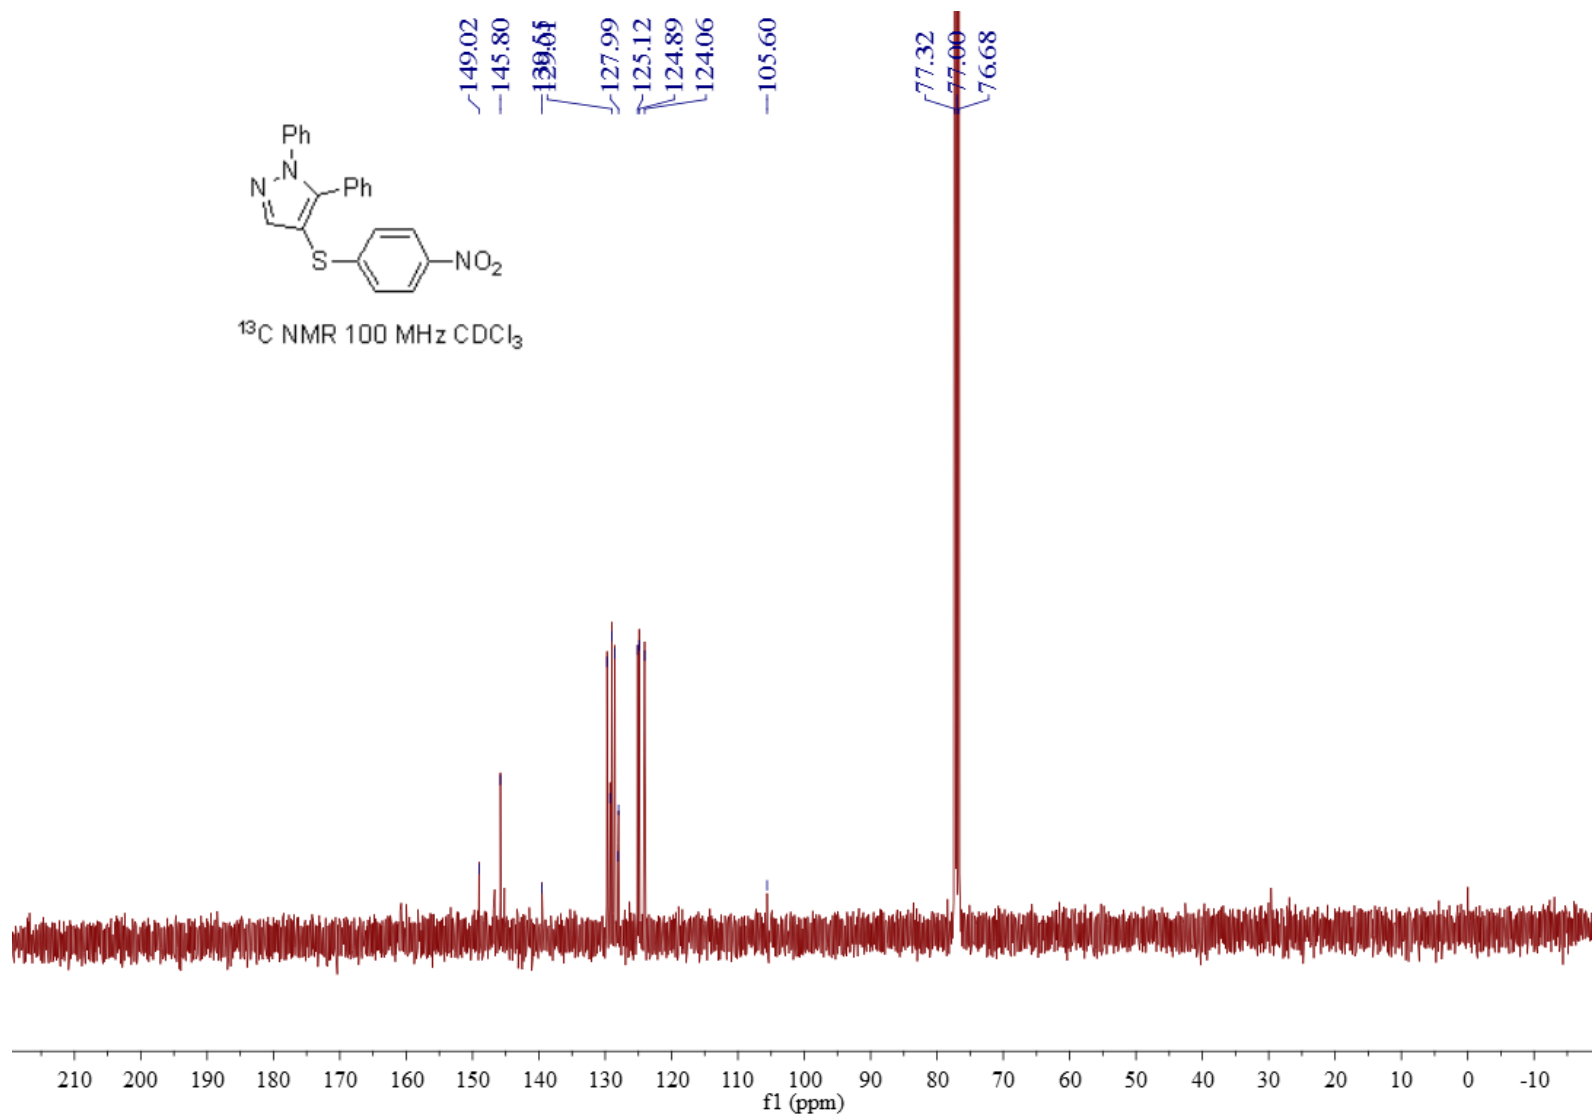

3i

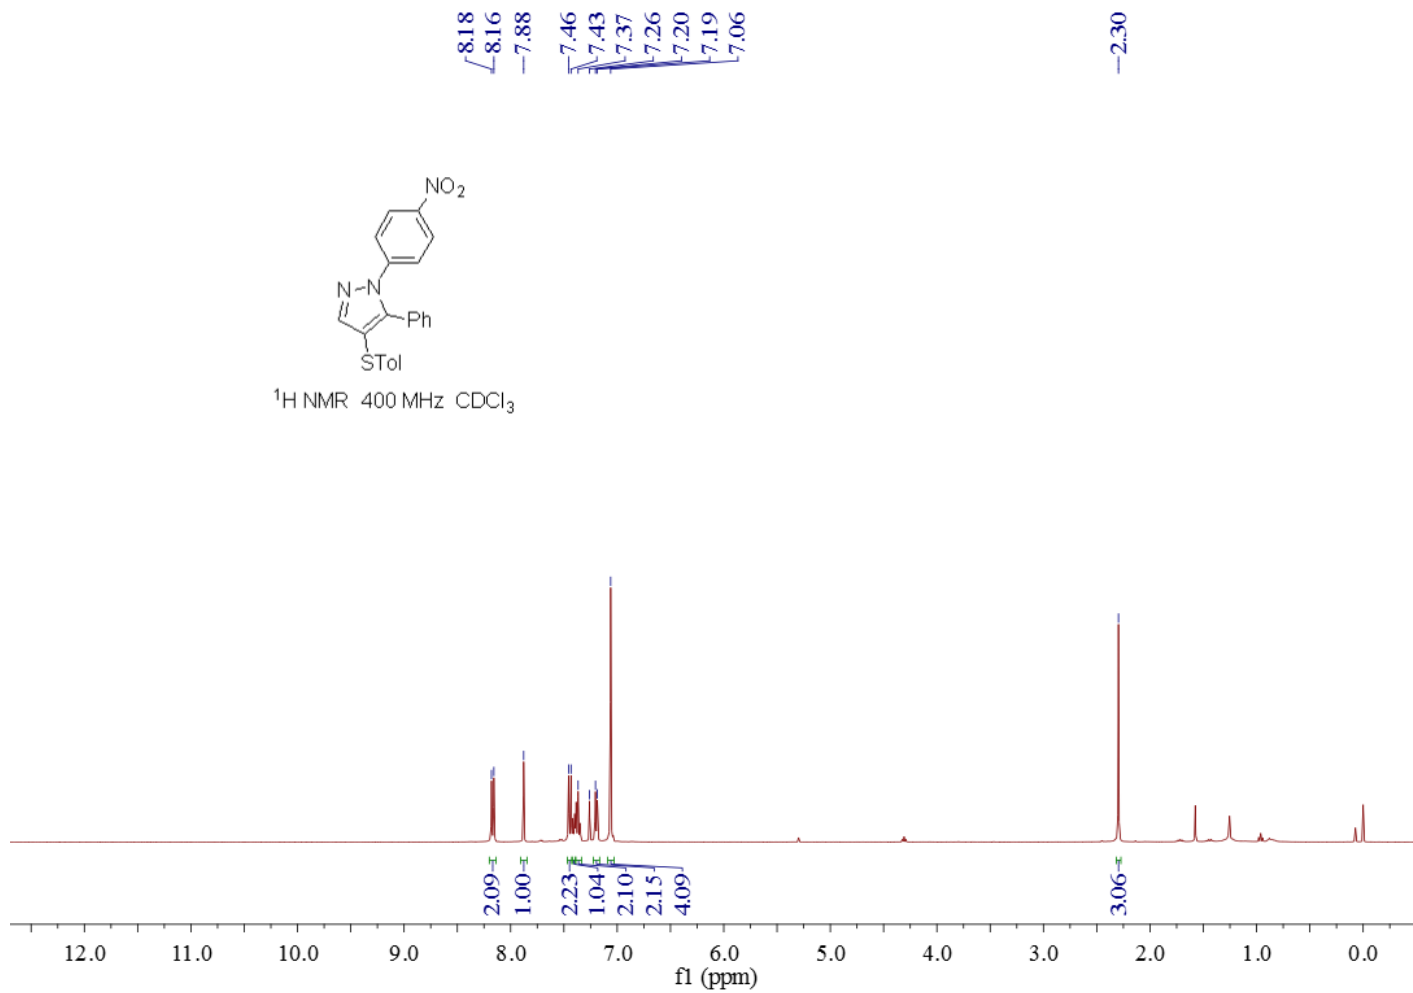

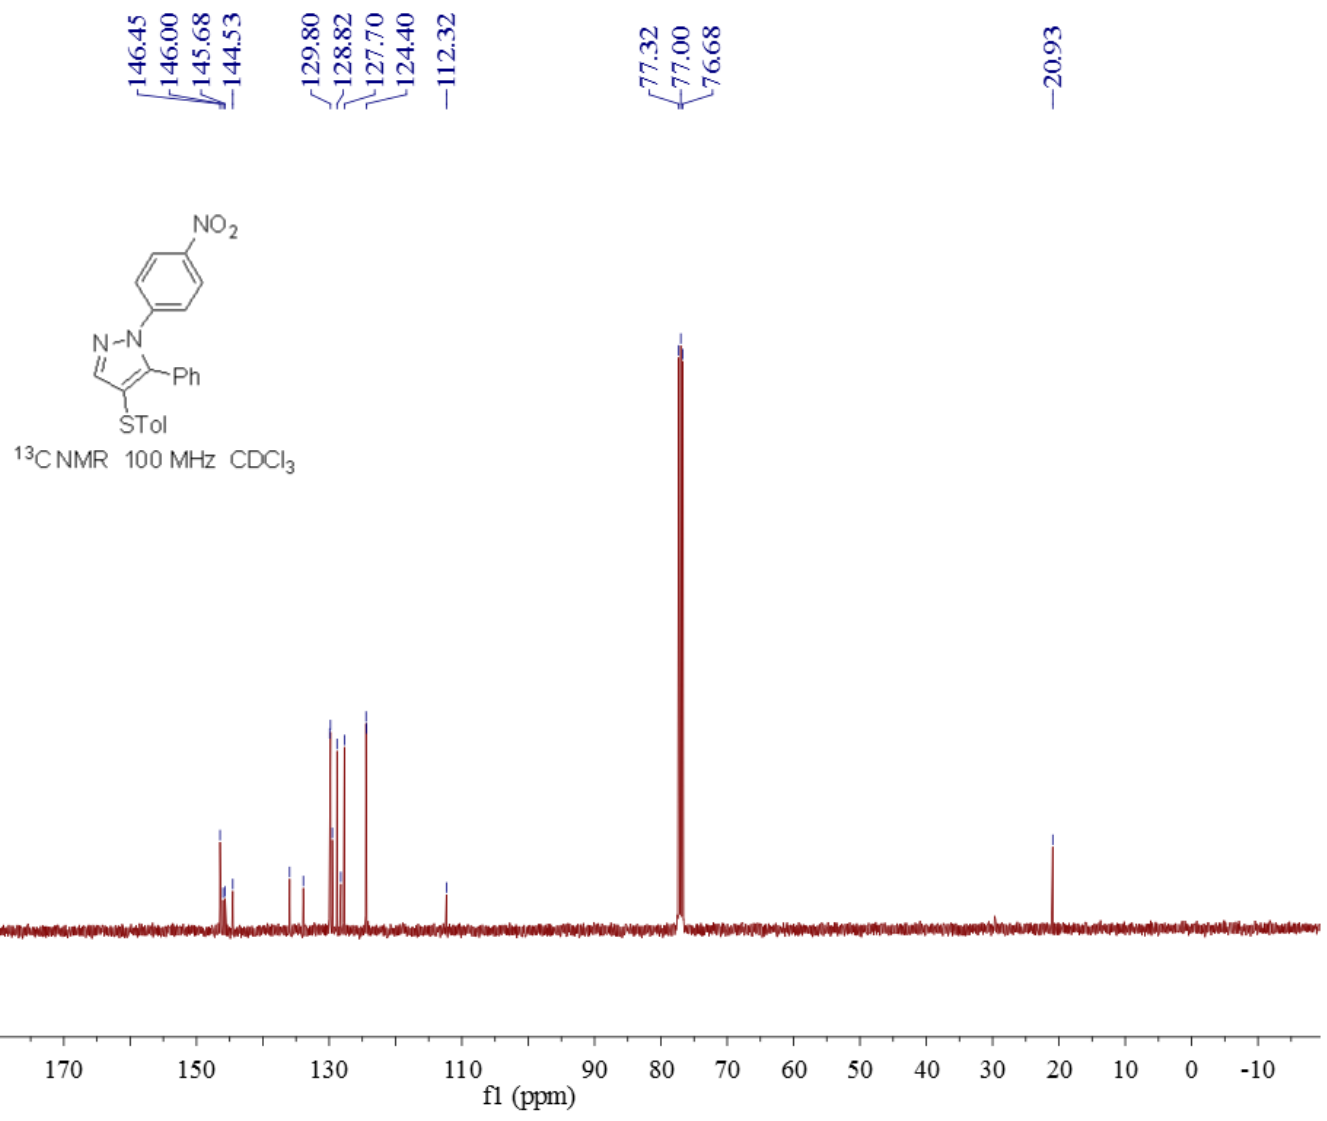

3j

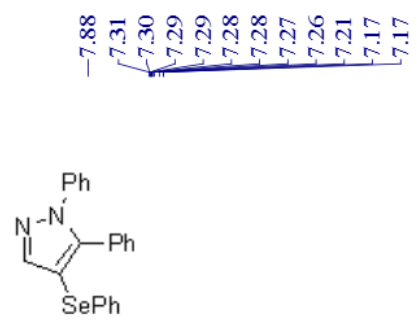

<sup>1</sup>H NMR 400 MHz CDCl<sub>3</sub>

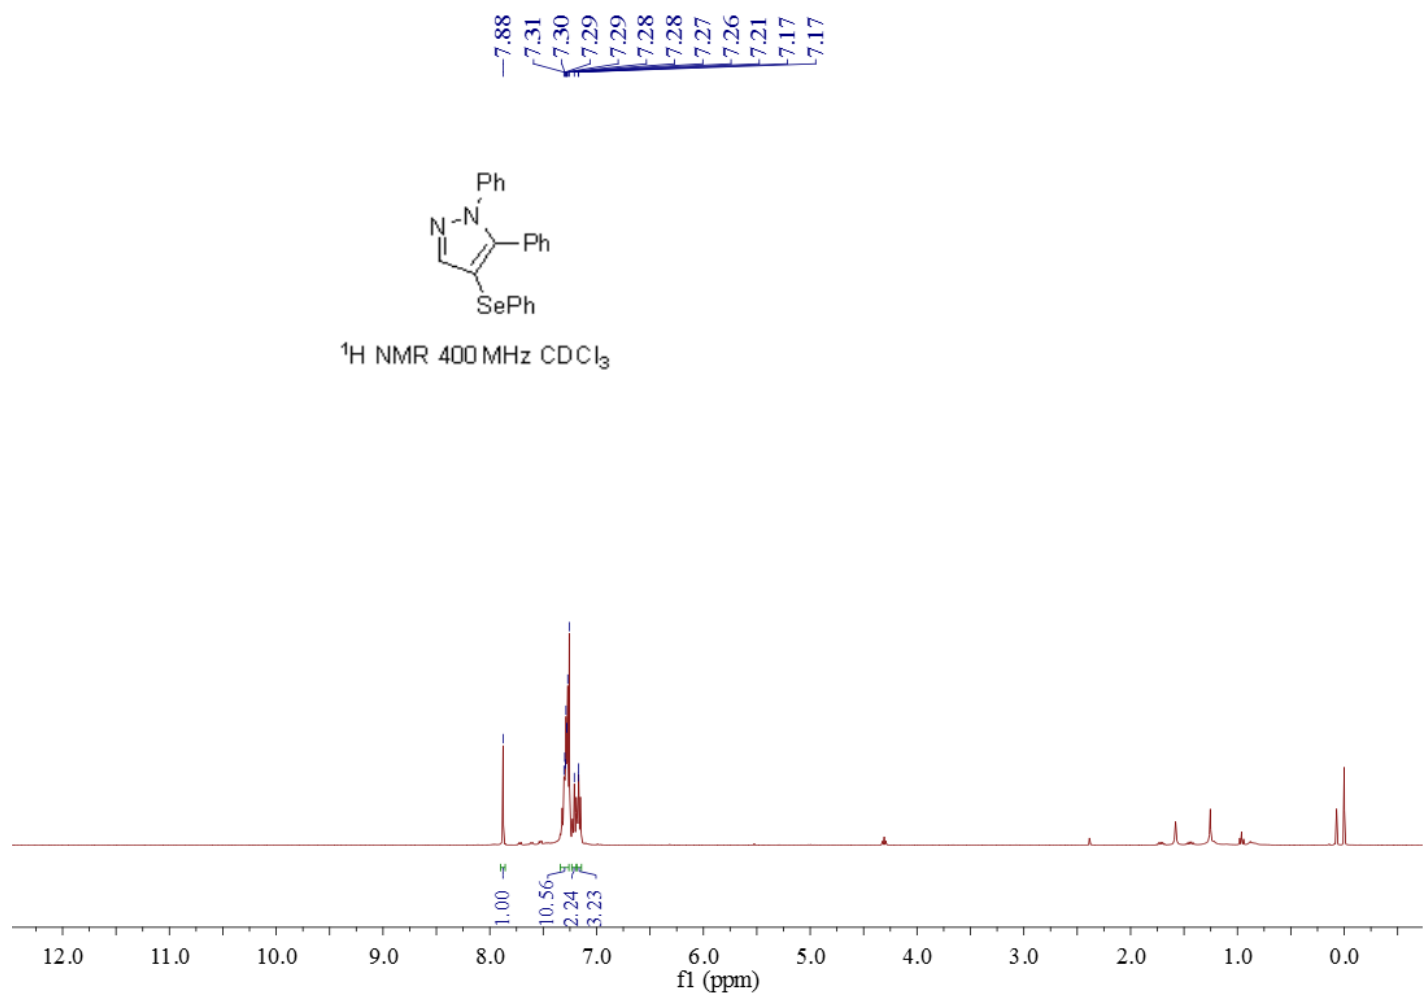

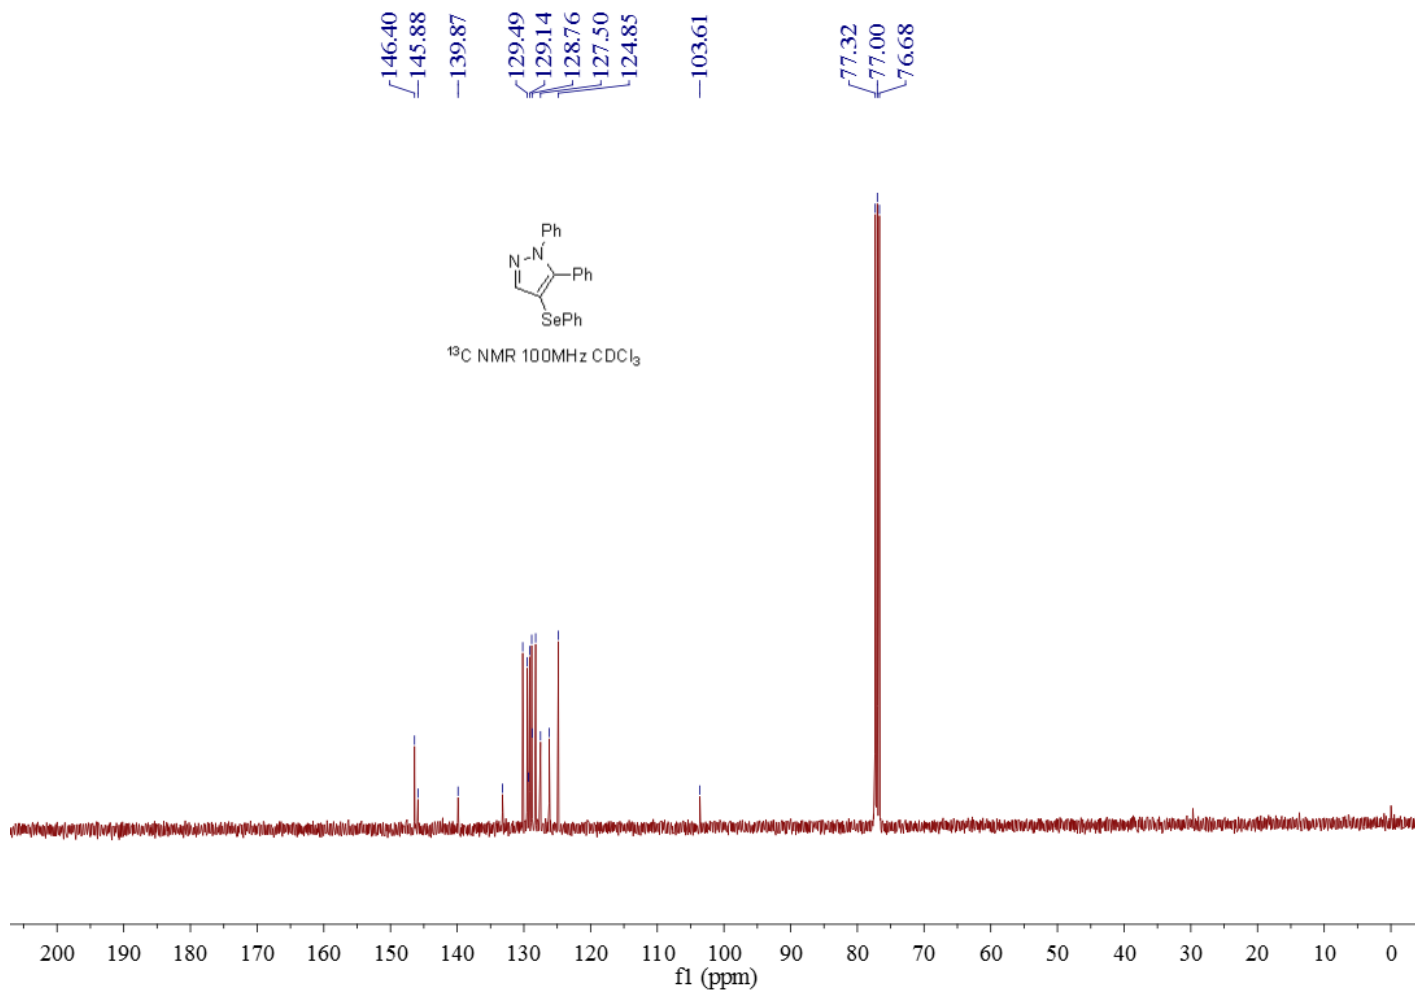

7a

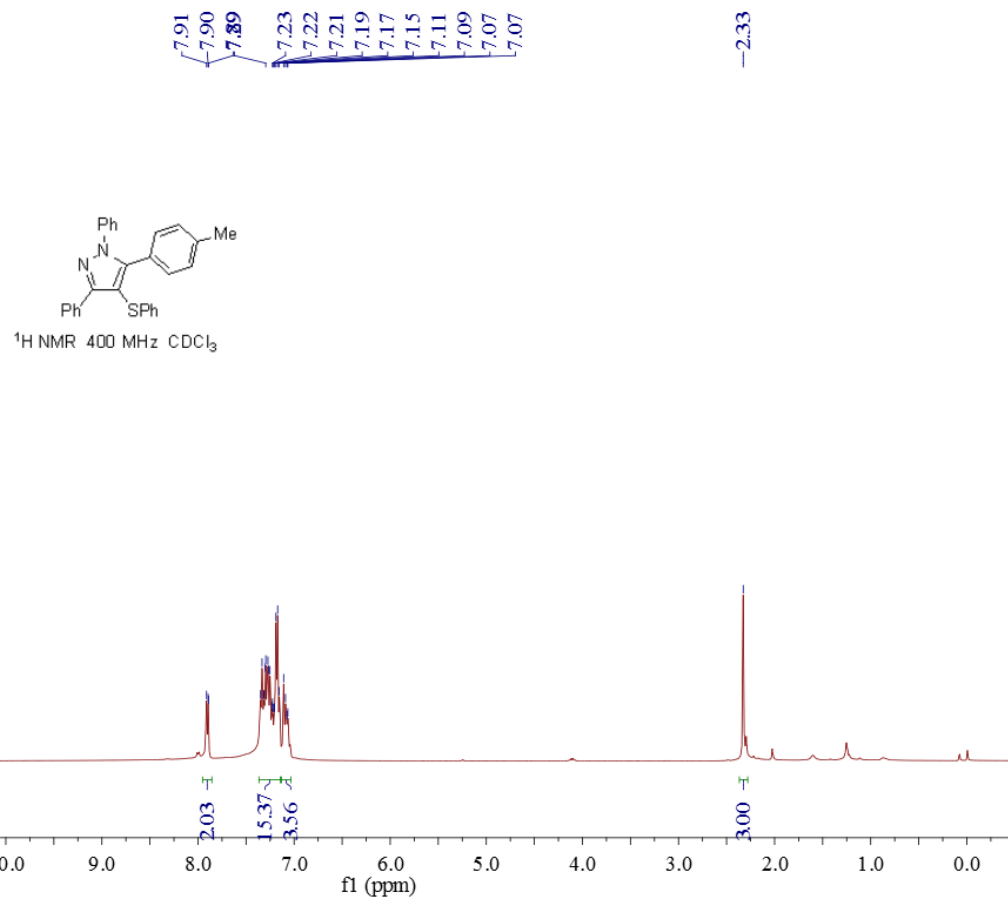



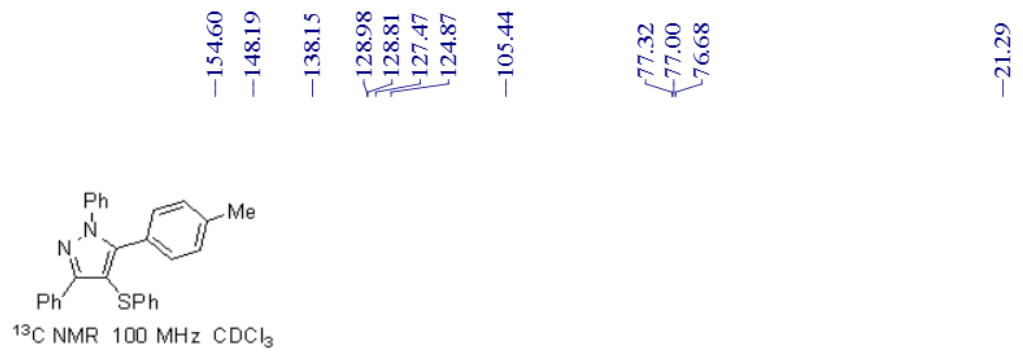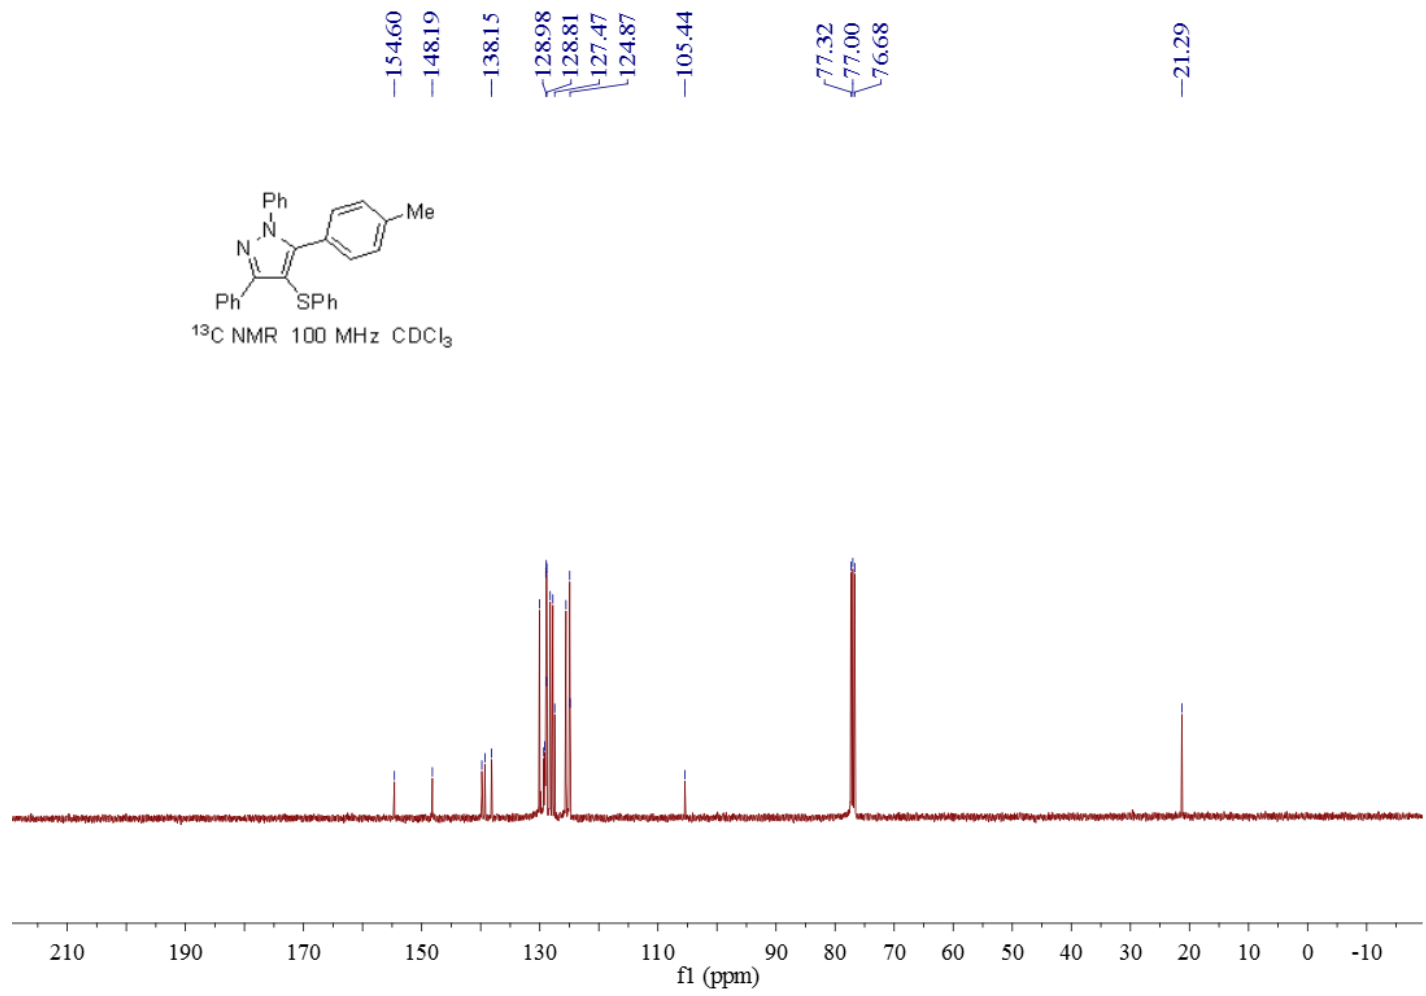

7b

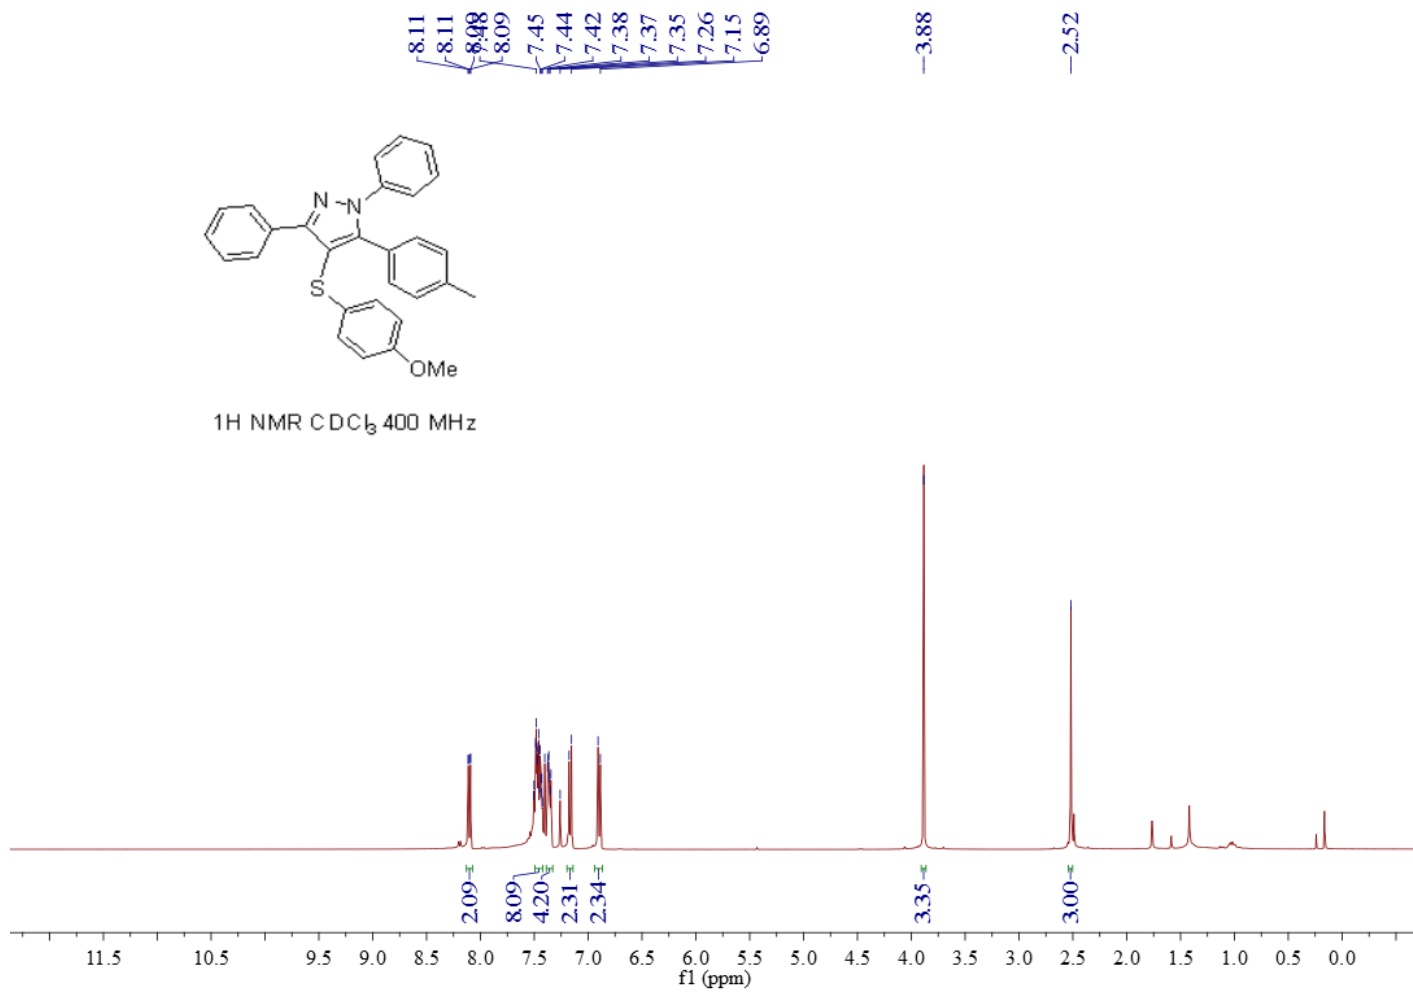

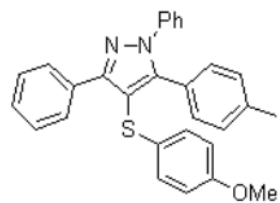

$^{13}\text{C}$  NMR  $\text{CDCl}_3$  100 MHz

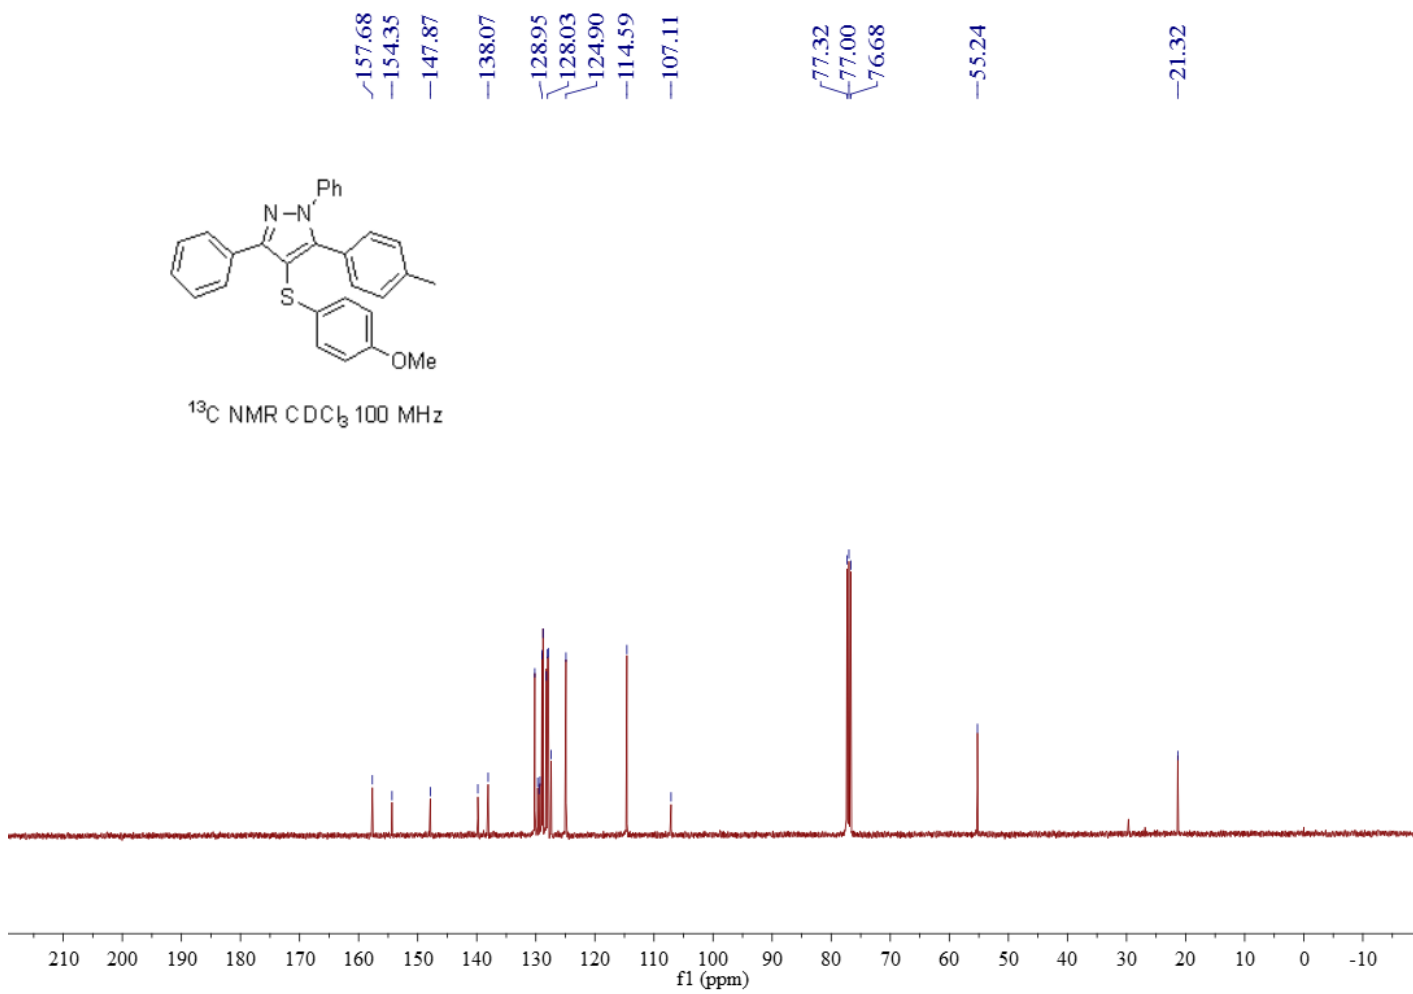

7c

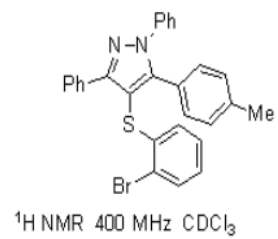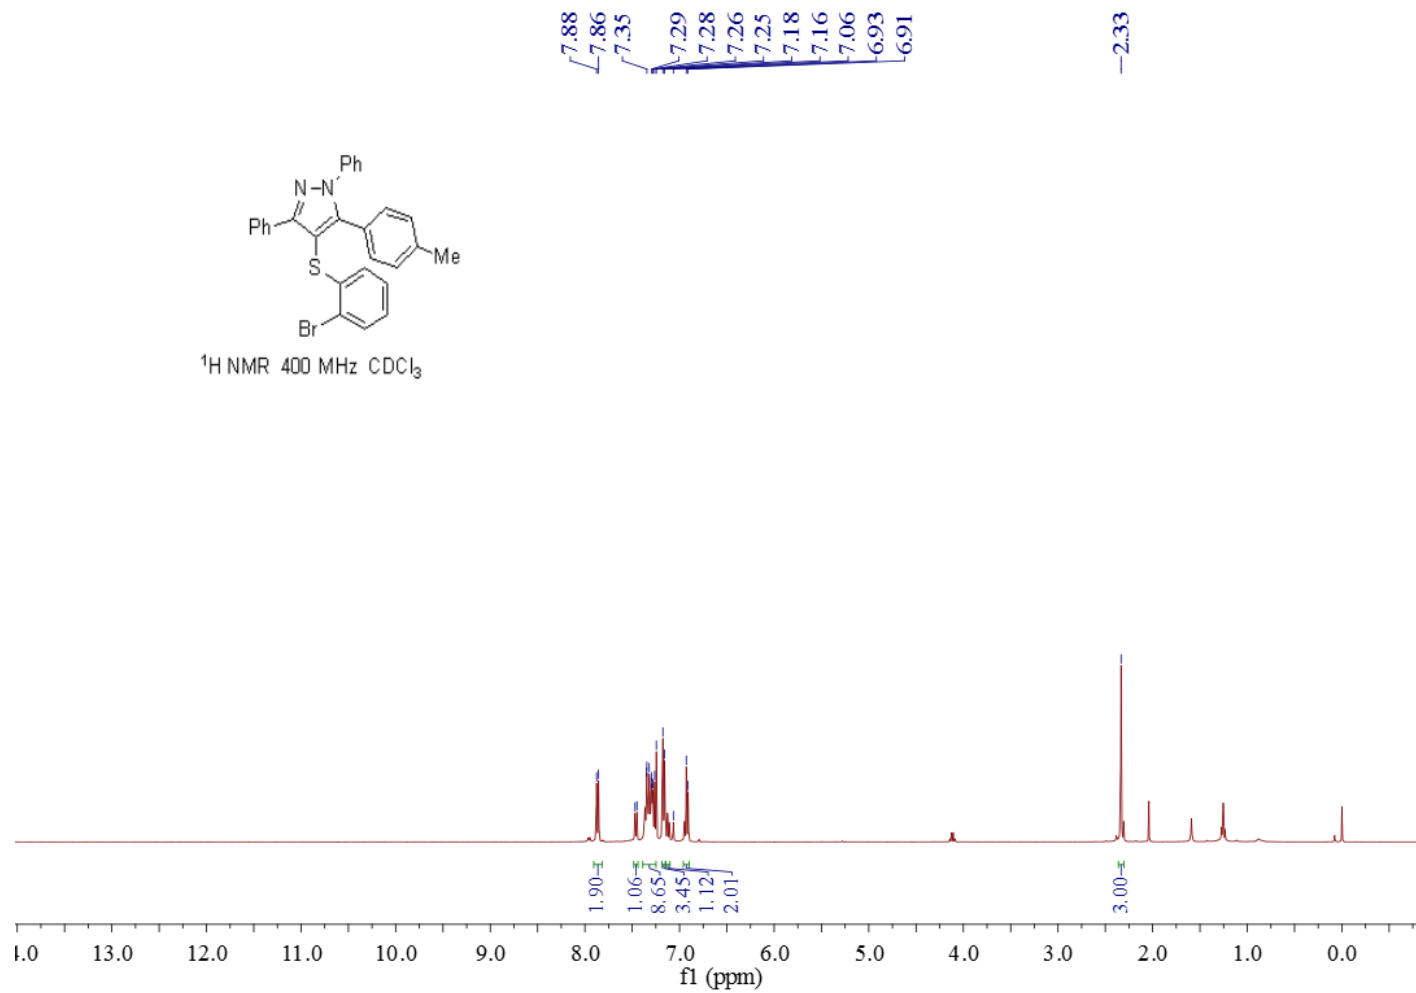

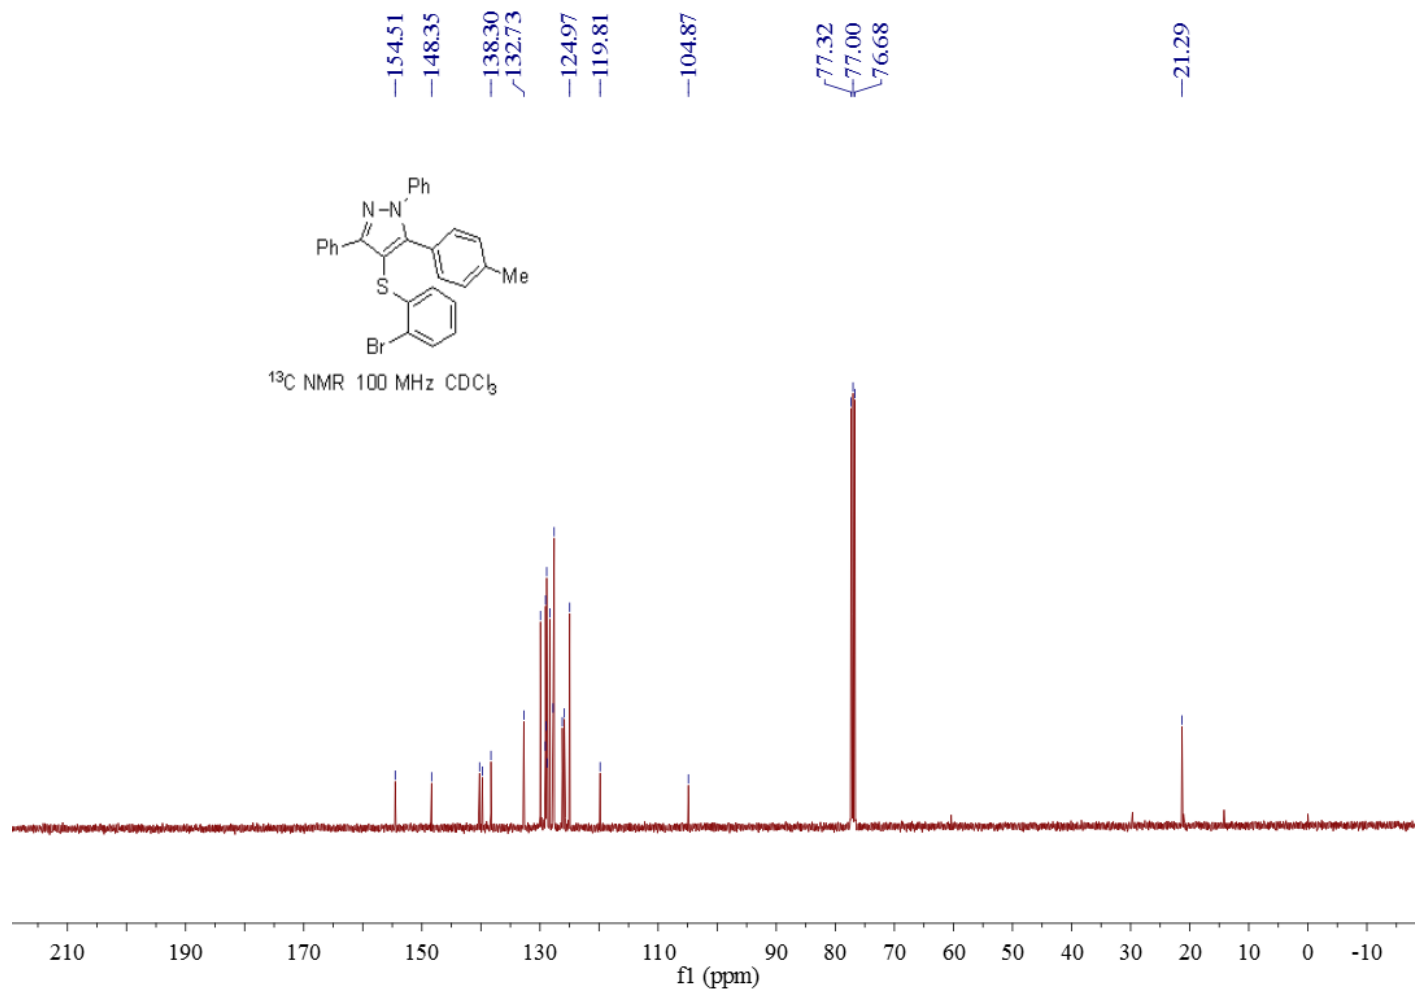

7d

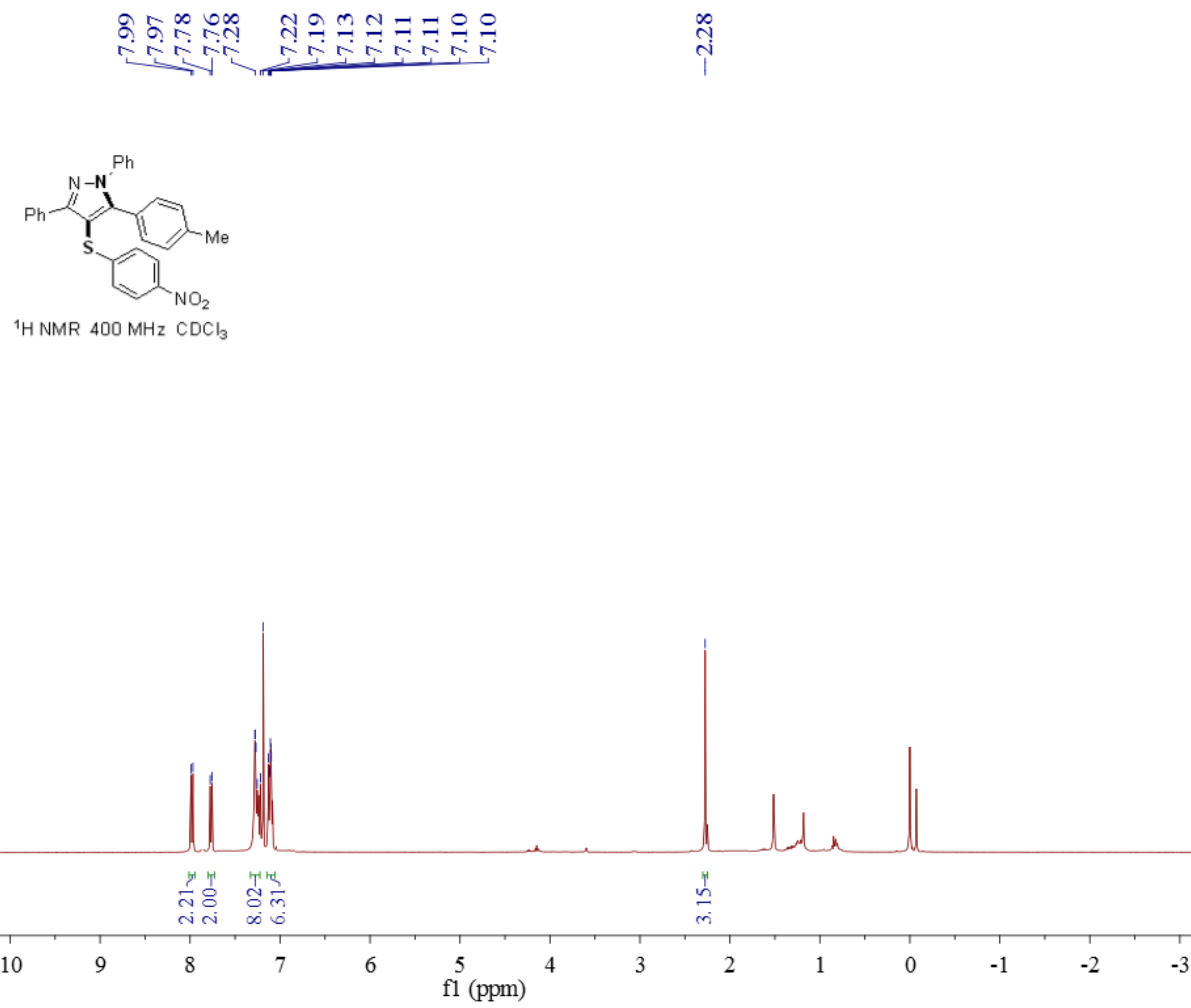

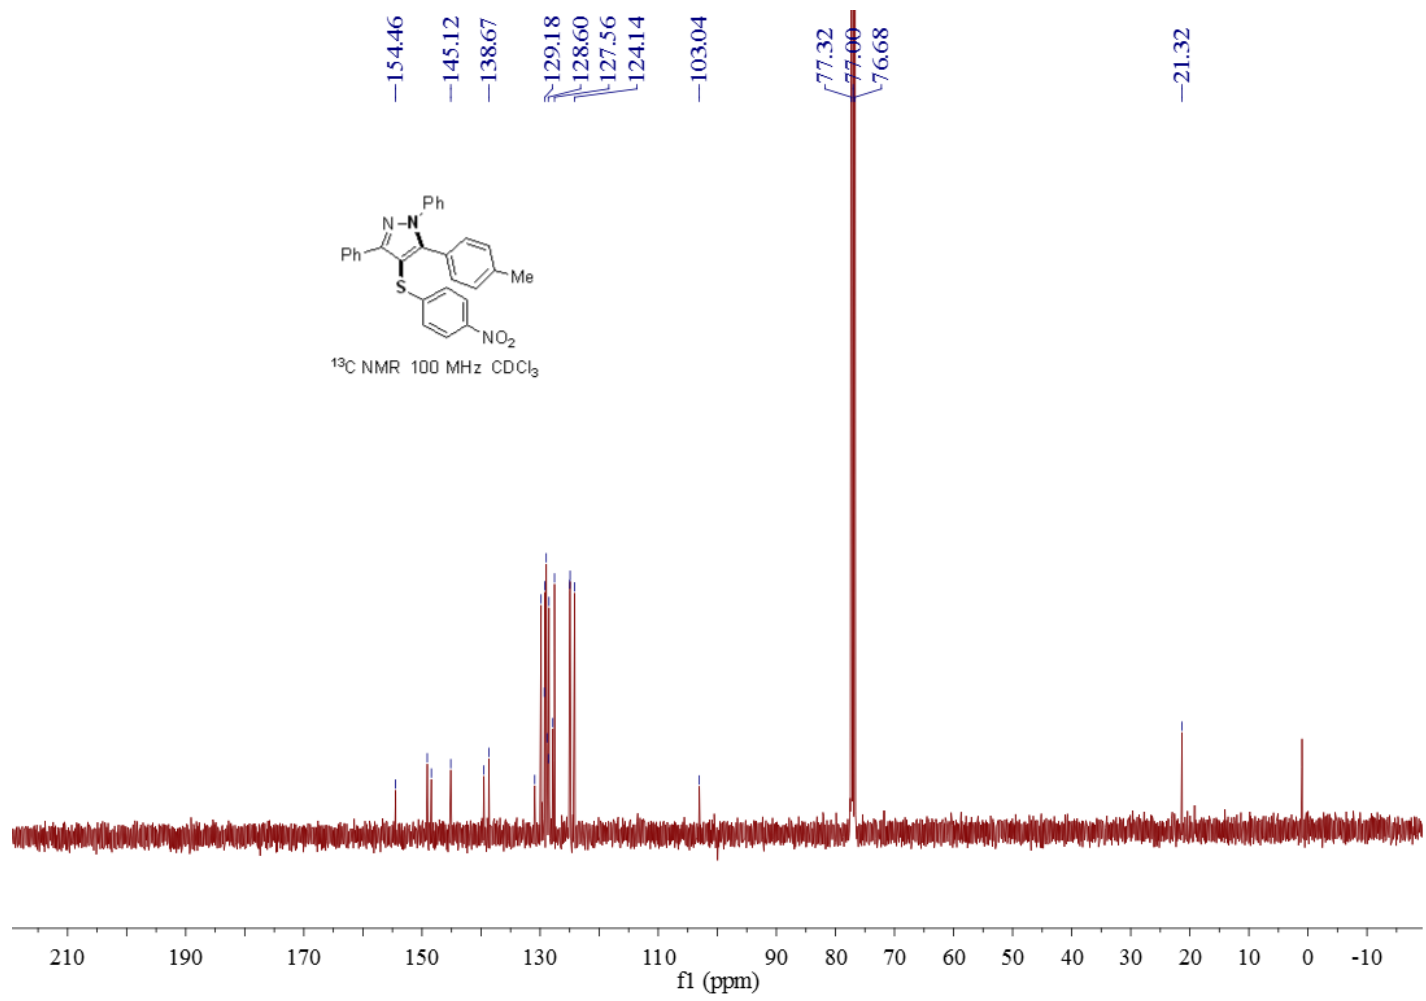

7e

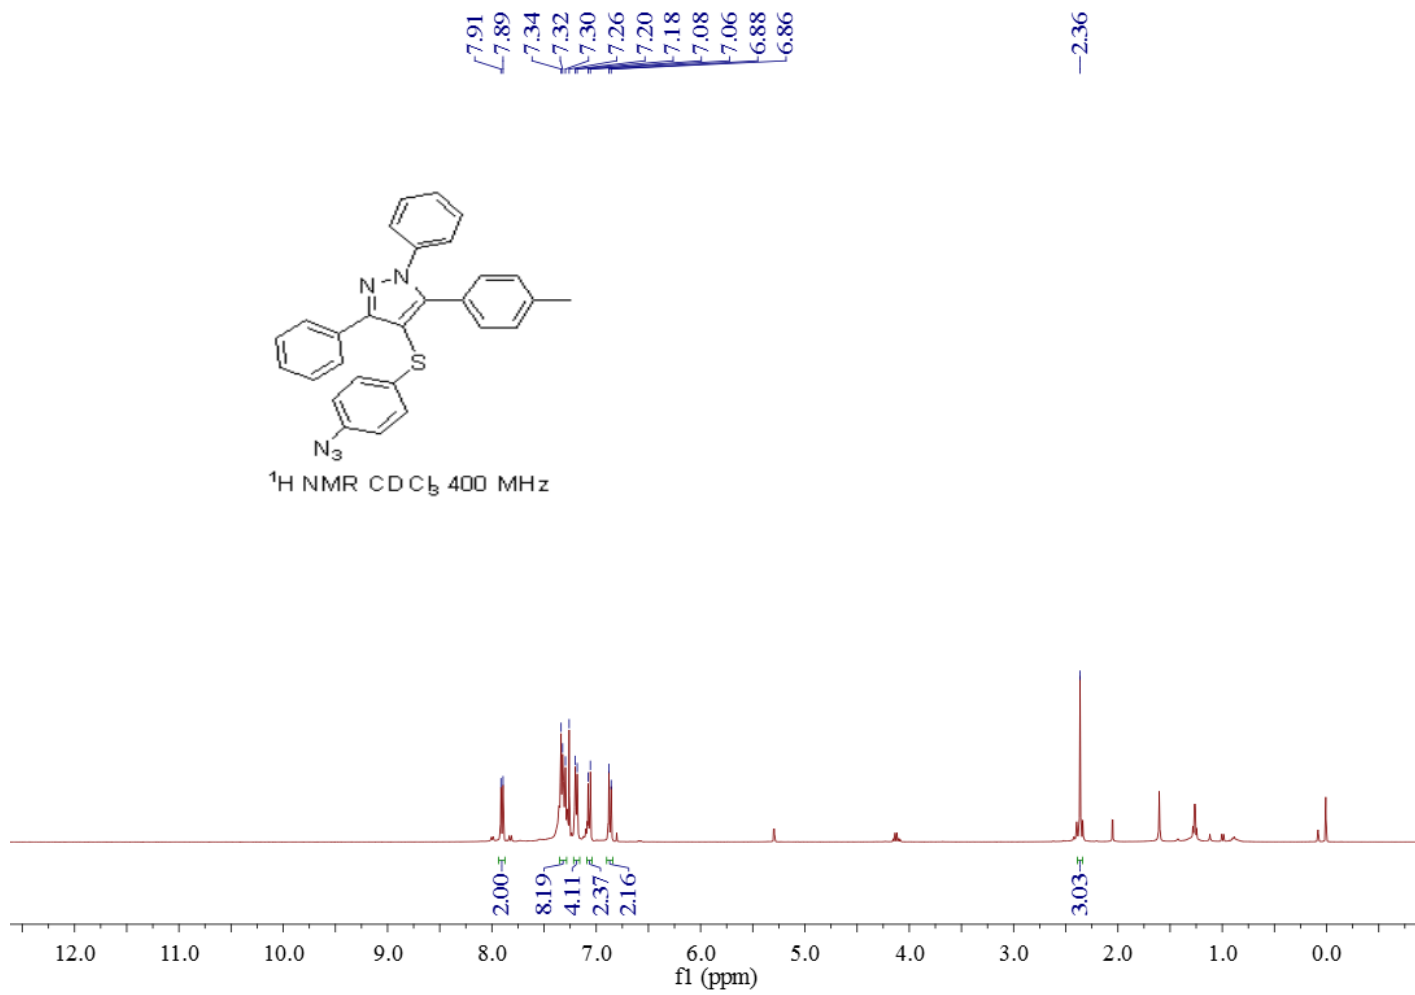



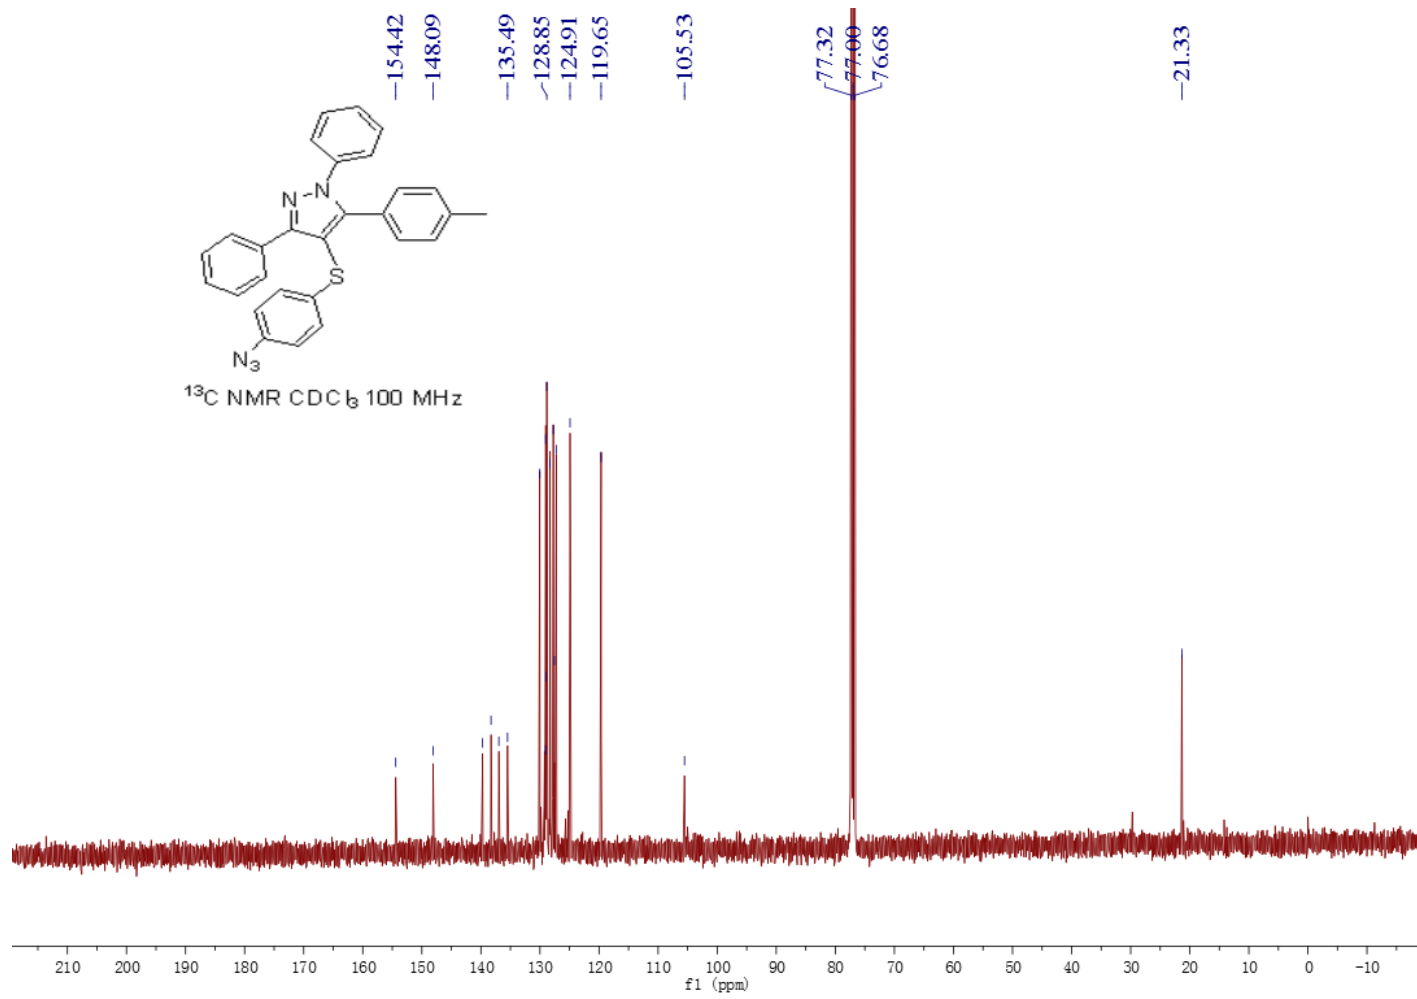

7f

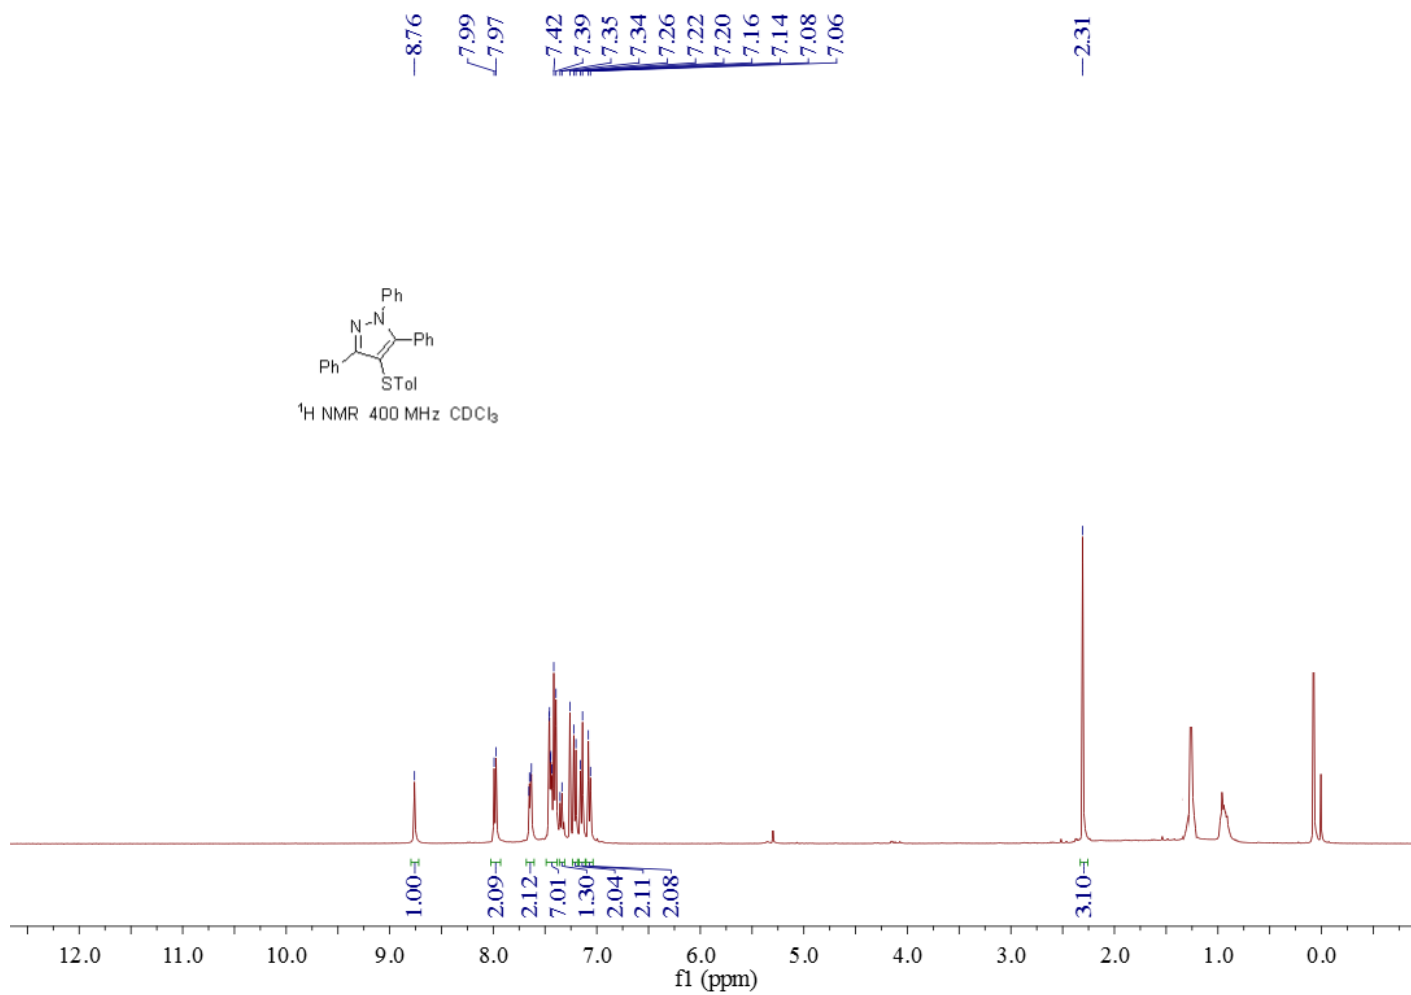

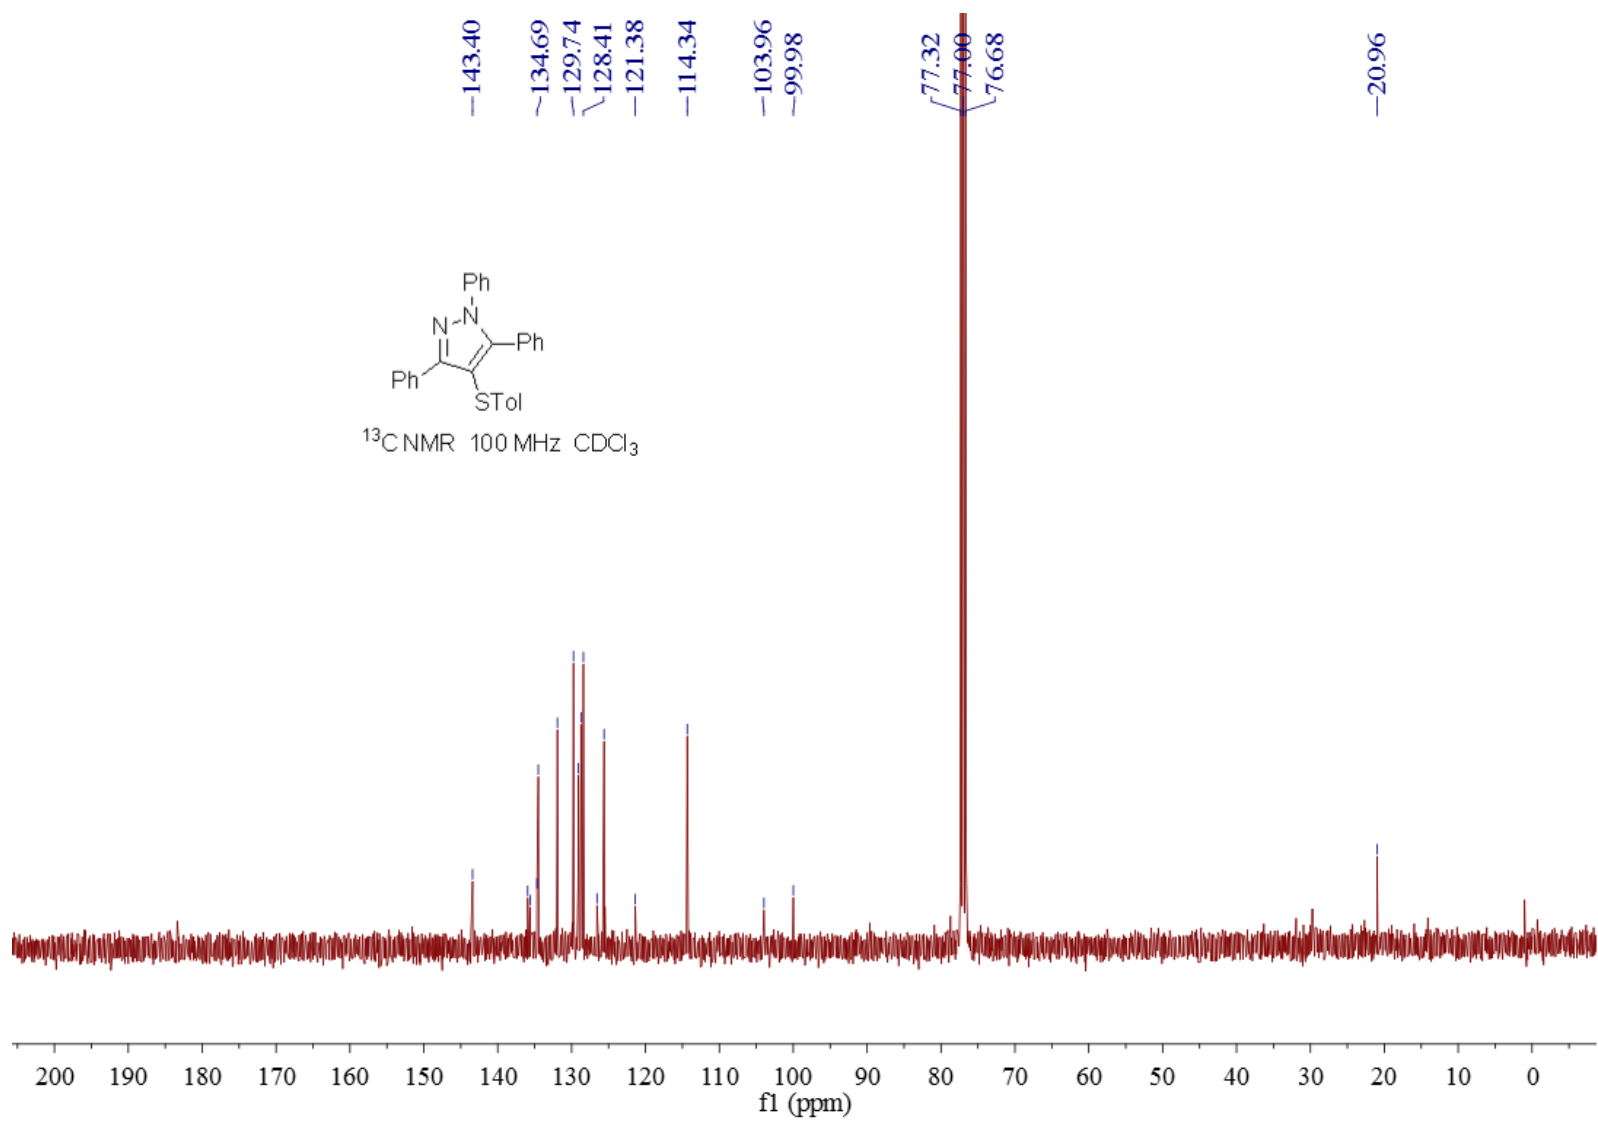

7h

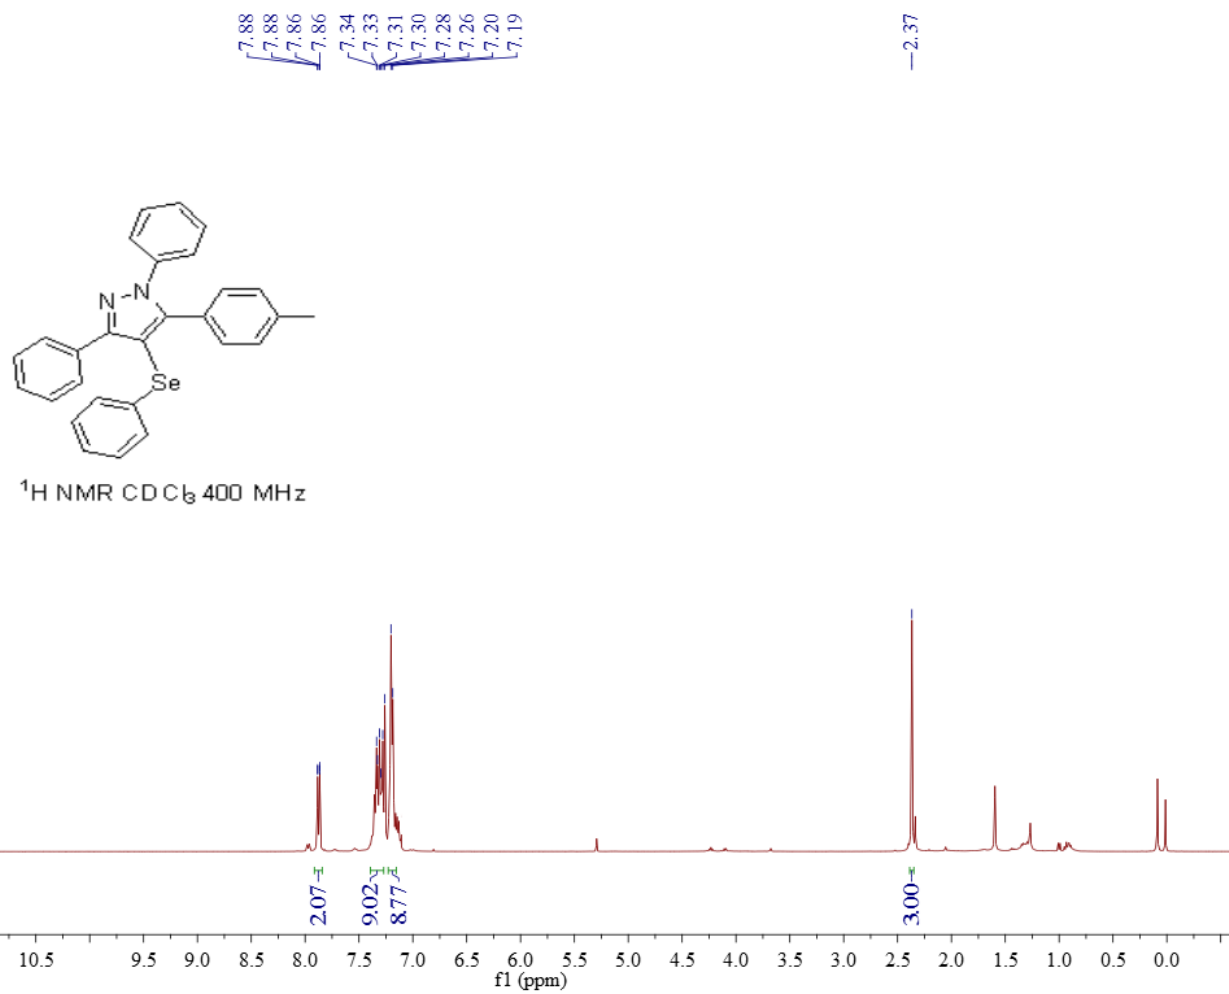

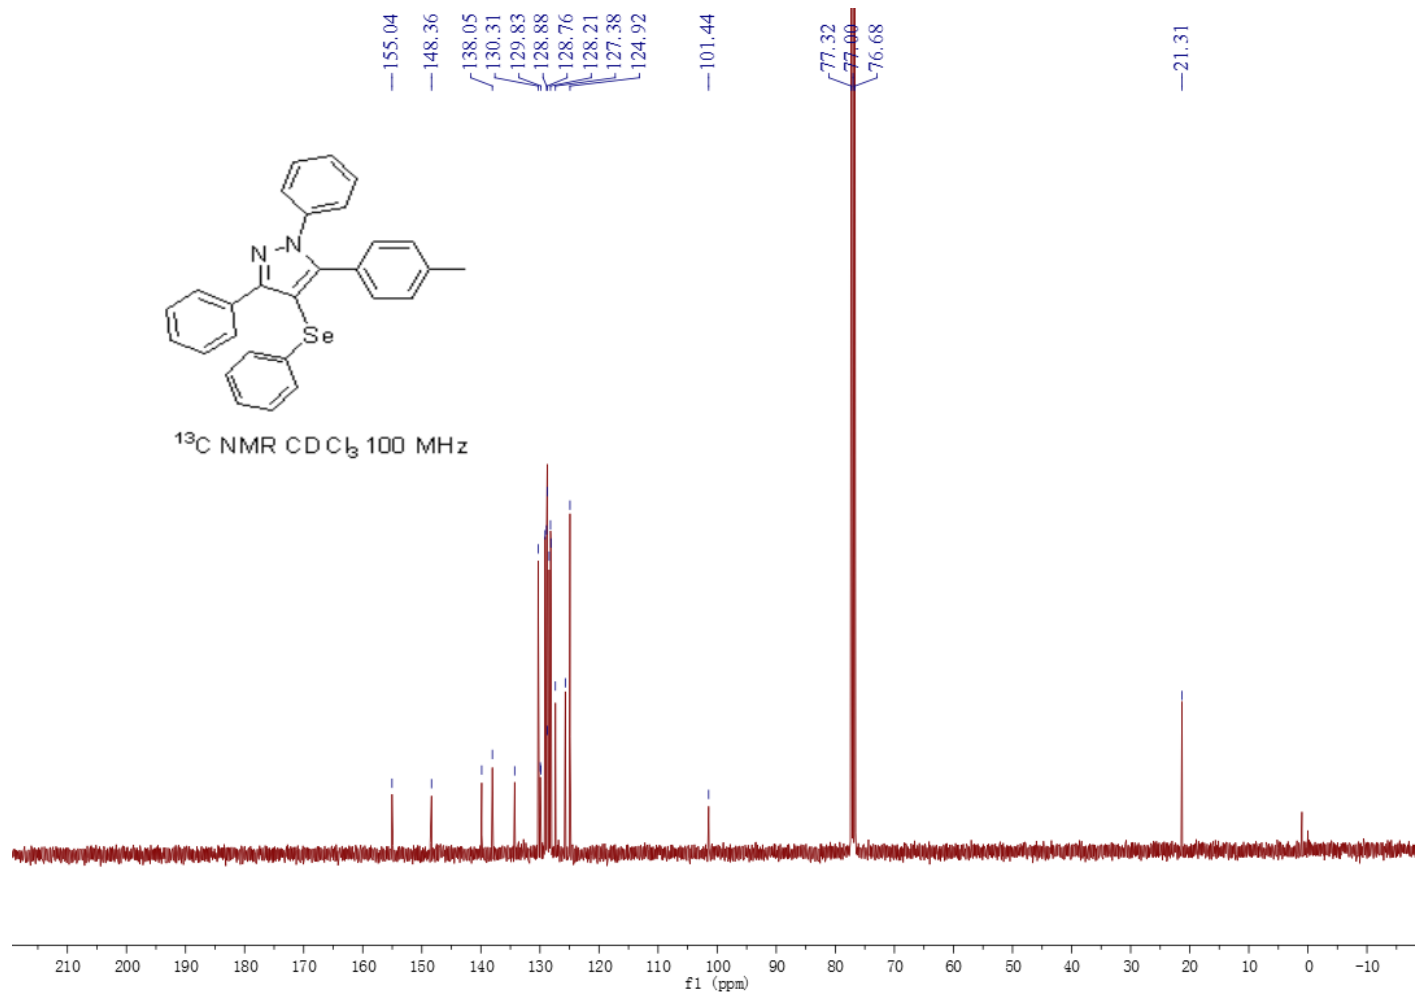

9

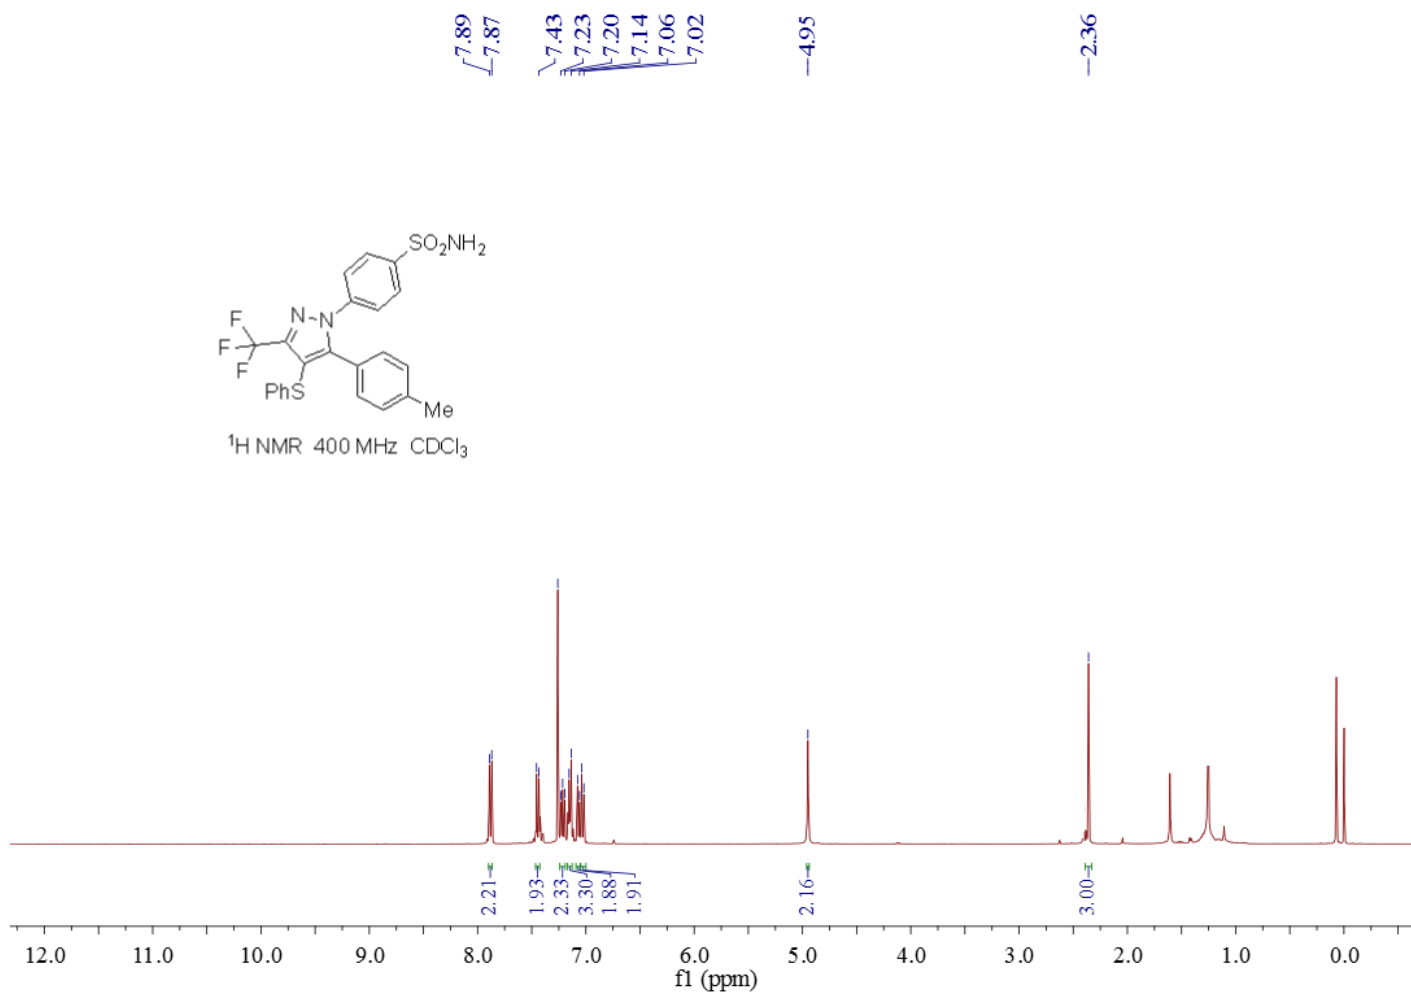

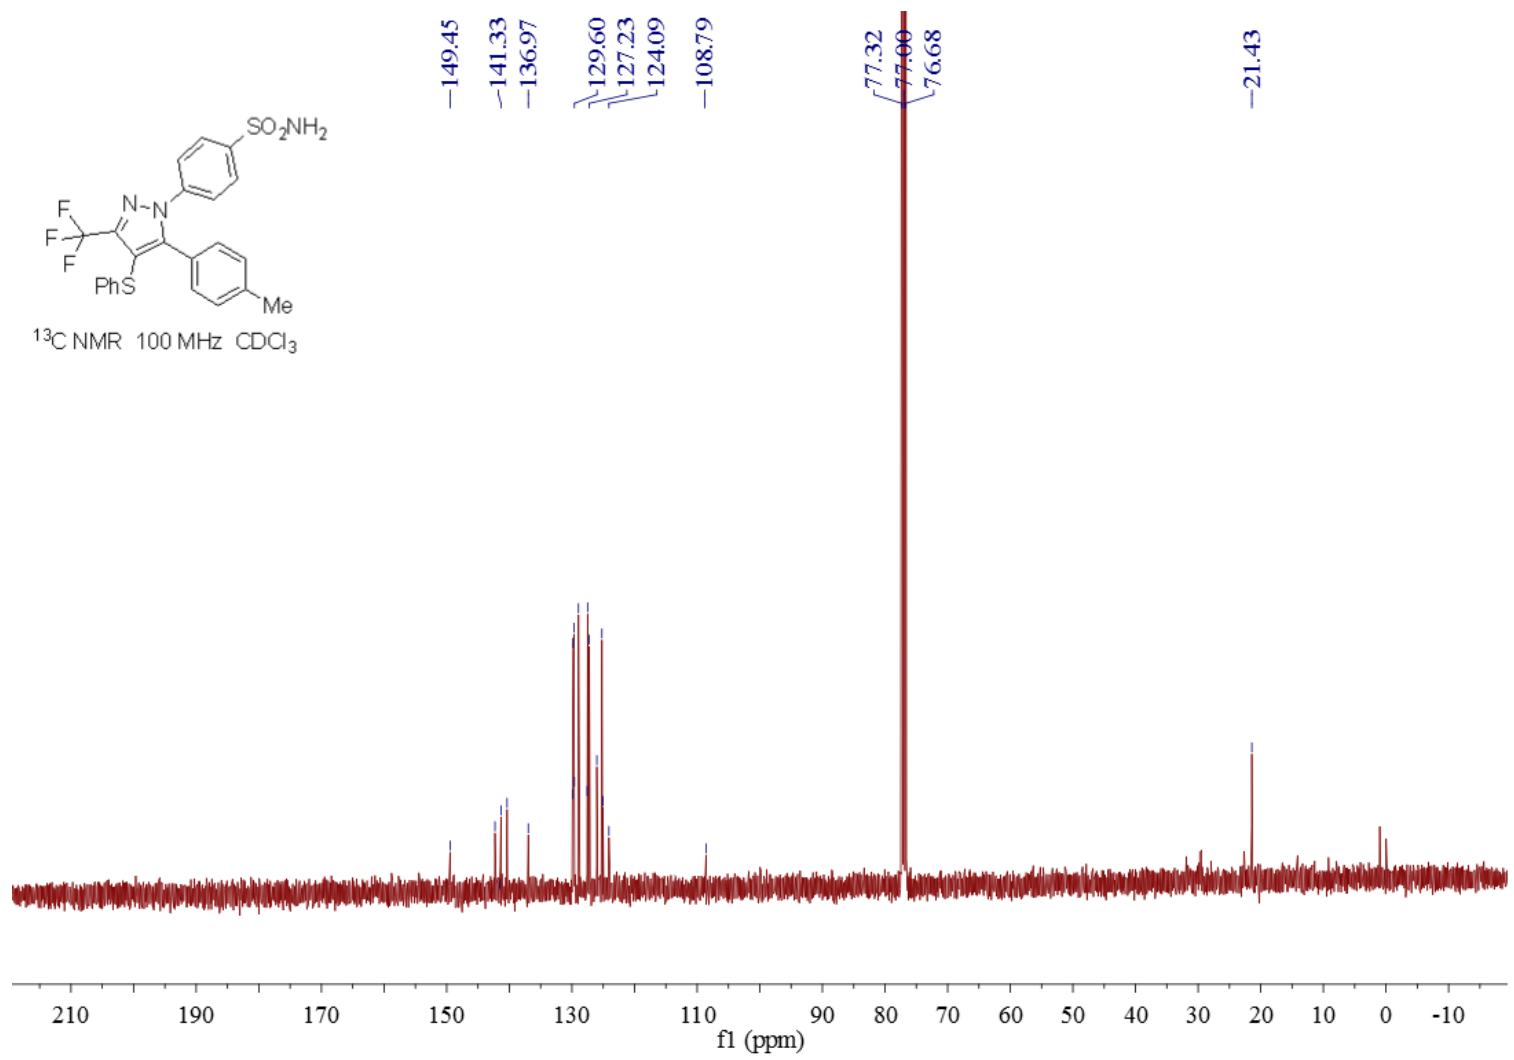

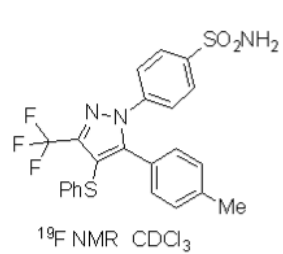

--61.95

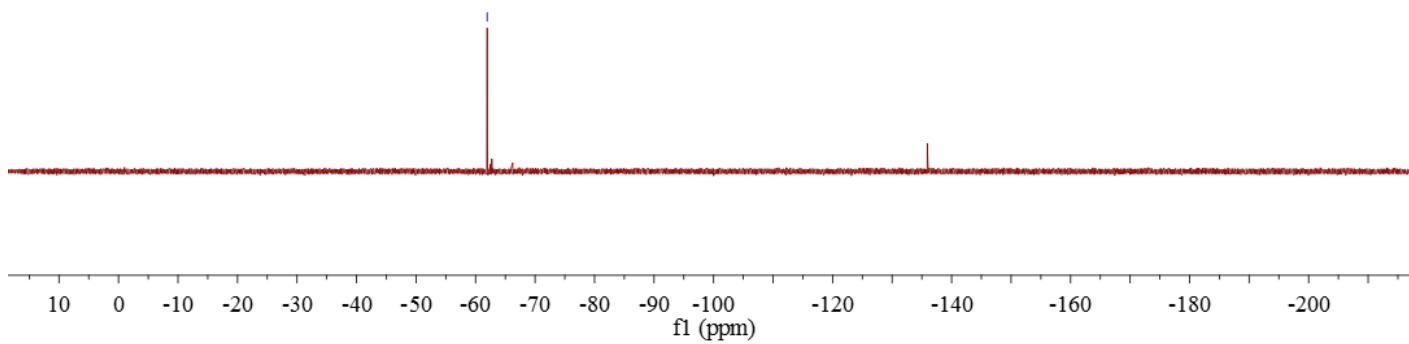

Supplement: d0ob00050g1.pdf [file d0ob00050g1.pdf]
